# Supplementary material for: An open-label pilot trial of faecal microbiome transfer to restore the gut microbiome in anorexia nervosa: protocol
Source: PubMed Central journal article supplement — BMJ Open. 2023 Jul 10;13(7):e070616. doi: 10.1136/bmjopen-2022-070616 (PMC10335415; doi:10.1136/bmjopen-2022-070616), 2023-07-10
Supplement: bmjopen-2022-070616.draft_revisions.pdf [file bmjopen-2022-070616.draft_revisions.pdf]

# BMJ Open

BMJ Open is committed to open peer review. As part of this commitment we make the peer review history of every article we publish publicly available.

When an article is published we post the peer reviewers' comments and the authors' responses online. We also post the versions of the paper that were used during peer review. These are the versions that the peer review comments apply to.

The versions of the paper that follow are the versions that were submitted during the peer review process. They are not the versions of record or the final published versions. They should not be cited or distributed as the published version of this manuscript.

BMJ Open is an open access journal and the full, final, typeset and author-corrected version of record of the manuscript is available on our site with no access controls, subscription charges or pay-per-view fees (<http://bmjopen.bmj.com>).

If you have any questions on BMJ Open's open peer review process please email [info.bmjopen@bmj.com](mailto:info.bmjopen@bmj.com)

# BMJ Open

## Protocol for Gut Bugs in Anorexia Nervosa: An open-label pilot trial of faecal microbiome transfer to restore the gut microbiome in anorexia nervosa

|                               |                                                                                                                                                                                                                                                                                                                                                                                                                                                                                                                                                                                                                                                                                                                                                                                                                                                                                                                                                                                                                                                                                                                                        |
|-------------------------------|----------------------------------------------------------------------------------------------------------------------------------------------------------------------------------------------------------------------------------------------------------------------------------------------------------------------------------------------------------------------------------------------------------------------------------------------------------------------------------------------------------------------------------------------------------------------------------------------------------------------------------------------------------------------------------------------------------------------------------------------------------------------------------------------------------------------------------------------------------------------------------------------------------------------------------------------------------------------------------------------------------------------------------------------------------------------------------------------------------------------------------------|
| Journal:                      | <i>BMJ Open</i>                                                                                                                                                                                                                                                                                                                                                                                                                                                                                                                                                                                                                                                                                                                                                                                                                                                                                                                                                                                                                                                                                                                        |
| Manuscript ID                 | bmjopen-2022-070616                                                                                                                                                                                                                                                                                                                                                                                                                                                                                                                                                                                                                                                                                                                                                                                                                                                                                                                                                                                                                                                                                                                    |
| Article Type:                 | Protocol                                                                                                                                                                                                                                                                                                                                                                                                                                                                                                                                                                                                                                                                                                                                                                                                                                                                                                                                                                                                                                                                                                                               |
| Date Submitted by the Author: | 07-Dec-2022                                                                                                                                                                                                                                                                                                                                                                                                                                                                                                                                                                                                                                                                                                                                                                                                                                                                                                                                                                                                                                                                                                                            |
| Complete List of Authors:     | Wilson, Brooke; The University of Auckland, Liggins Institute<br>Derraik, José; The University of Auckland, Liggins Institute; The University of Auckland, Department of Paediatrics: Child and Youth Health, Faculty of Medical and Health Sciences<br>Albert, Benjamin; The University of Auckland, Liggins Institute<br>Leong, Karen; The University of Auckland, Liggins Institute<br>Tweedie-Cullen, Ry; The University of Auckland, Liggins Institute<br>Creagh, Christine; The University of Auckland, Liggins Institute<br>Depczynski, Marysia; The University of Auckland, Liggins Institute<br>Edwards, Taygen; The University of Auckland, Liggins Institute<br>Vatanen, Tommi; The University of Auckland, Liggins Institute; University of Helsinki, Research Program for Clinical and Molecular Metabolism<br>Thabrew, Hiran; The University of Auckland, Psychological Medicine; The University of Auckland, Te Ara Hāro, Centre for Infant, Child and Adolescent Mental Health<br>Cutfield, Wayne; The University of Auckland, Liggins Institute<br>O'Sullivan, Justin ; The University of Auckland, Liggins Institute |
| Keywords:                     | Eating disorders < PSYCHIATRY, MICROBIOLOGY, THERAPEUTICS, Transplant medicine < INTERNAL MEDICINE, GASTROENTEROLOGY                                                                                                                                                                                                                                                                                                                                                                                                                                                                                                                                                                                                                                                                                                                                                                                                                                                                                                                                                                                                                   |
|                               |                                                                                                                                                                                                                                                                                                                                                                                                                                                                                                                                                                                                                                                                                                                                                                                                                                                                                                                                                                                                                                                                                                                                        |

SCHOLARONE™  
Manuscripts

# Protocol for Gut Bugs in Anorexia Nervosa

## An open-label pilot trial of faecal microbiome transfer to restore the gut microbiome in anorexia nervosa

Brooke C. Wilson<sup>a</sup>, José G. B. Derraik<sup>a,b</sup>, Benjamin B. Albert<sup>a</sup>, Karen S. W. Leong<sup>a</sup>, Ry Y. Tweedie-Cullen<sup>a</sup>, Christine Creagh<sup>a</sup>, Marysia Depczynski<sup>a</sup>, Taygen Edwards<sup>a</sup>, Tommi Vatanen<sup>a,c</sup>, Hiran Thabrew<sup>d,e</sup>, Wayne S. Cutfield<sup>a\*</sup>, Justin M. O'Sullivan<sup>a\*</sup>

- a. Liggins Institute, University of Auckland, Auckland, New Zealand.
- b. Department of Paediatrics: Child and Youth Health, Faculty of Medical and Health Sciences, University of Auckland, Auckland, New Zealand.
- c. Research Program for Clinical and Molecular Metabolism, University of Helsinki, Finland
- d. Department of Psychological Medicine, University of Auckland, Auckland, New Zealand.
- e. Te Ara Hāro, Centre for Infant, Child and Adolescent Mental Health, University of Auckland, Auckland New Zealand.

### \*Joint Correspondence

Professor Wayne Cutfield & Professor Justin O'Sullivan

Address: Liggins Institute, University of Auckland, Private Bag 92019, Auckland, New Zealand

Email: [w.cutfield@auckland.ac.nz](mailto:w.cutfield@auckland.ac.nz), [justin.osullivan@auckland.ac.nz](mailto:justin.osullivan@auckland.ac.nz)

### Version

1

**Word count** (excludes abstract, tables, acknowledgements, author contributions, COI, references)

3940

## 27 ABSTRACT

28  
29 **Introduction:** Individuals with anorexia nervosa (AN) harbour distinct gut microbiomes compared to healthy  
30 individuals, which are sufficient to induce weight loss and anxiety-like behaviours when transplanted into  
31 germ-free mice. We hypothesise that faecal microbiome transfer (FMT) from healthy donors would help  
32 restore the gut microbiome of individuals with AN, which in turn, may aid patient recovery.

33  
34 **Methods:** We aim to conduct an open-label pilot study in 20 females aged 16-25 years who meet the DSM-5  
35 criteria for AN and have a BMI 13-19 kg/m<sup>2</sup>. We will recruit four healthy, lean, female donors, aged 18-32  
36 years, who will undergo extensive clinical screening prior to stool donation. Faecal microbiota will be  
37 harvested from donors and double encapsulated in delayed release, acid-resistant capsules. All participants  
38 will receive a single course of 20 FMT capsules (five from each donor) which they can choose to take over  
39 two or four consecutive days. Stool and blood samples will be collected from participants over a period of  
40 three months to assess their gut microbiome profile, metabolome, intestinal inflammation, and nutritional  
41 status. Our primary outcome is a shift in the gut microbiome composition at 3 weeks post-FMT (Bray-Curtis  
42 dissimilarity). We will also monitor participants' body composition (DXA scans), eating disorder  
43 psychopathology, mental health, and assess their views on, and tolerability of, treatment. All adverse events  
44 will be recorded and reviewed by an independent data monitoring committee.

45  
46 **Ethics and dissemination:** Ethics approval was provided by the Central Health and Disability Ethics  
47 Committee (Ministry of Health, New Zealand, 21/CEN/212). Results will be published in peer-reviewed  
48 journals and presented to both scientific and consumer group audiences.

49  
50 **Trial registration:** Australian New Zealand Clinical Trials Registry (ACTRN12621001504808).

### 51 **STRENGTHS AND LIMITATIONS OF THIS STUDY**

- 52 • This pilot trial investigates FMT as a therapy for gut microbiome restoration in young women with AN.
- 53 • This study has been co-designed in consultation with eating disorder specialists and recovered  
54 individuals to minimise participant harm and stress.
- 55 • The use of high-resolution shotgun metagenomic sequencing will allow for a comprehensive gut  
56 microbiome assessment and longitudinal tracking of donor strain engraftment.
- 57 • While we will monitor clinical features of AN throughout the trial, efficacy of FMT on clinical outcomes  
58 cannot be assessed due to its design without a control group.
- 59 • By focusing on young women with AN, study findings may not necessarily apply to the broader population  
60 of individuals with AN.

## 54 INTRODUCTION

55 Anorexia nervosa (AN) is a complex and debilitating eating disorder characterised by extremely restrictive  
56 eating behaviour, very low body weight, a fear of weight gain, and body image distortion [1]. AN has the  
57 highest mortality rate among psychiatric disorders (standardised mortality ratio of 5.86 [2]) and is often  
58 accompanied by comorbidities including anxiety, depression, autoimmune disorders, and functional  
59 gastrointestinal disorders [2–5]. AN usually begins in adolescence and is more common in women (lifetime  
60 prevalence of 1.4% compared to 0.2% in men [6]). While its exact aetiology is unclear, the development of  
61 AN likely stems from both environmental triggers [7] and genetic predisposition [8, 9]. In addition, emerging  
62 evidence suggests the gut microbiome might also be involved in AN as an important regulator of appetite,  
63 mood, and metabolism [10–13].

64  
65 Multiple studies have shown that the gut microbiome is perturbed in individuals with AN compared to healthy  
66 individuals [14–20]. In particular, anorexia-associated microbiomes are typically less diverse [16, 17, 19]  
67 and contain proportionally more mucin-degrading bacterial species such as *Methanobrevibacter smithii* [14,  
68 17, 18, 20]. Degradation of the intestinal mucus lining can lead to increased permeability and translocation  
69 of bacterial products into circulation [21, 22], both of which have been observed in AN [23–26].

70  
71 While the gut microbiome alterations observed in AN are likely a consequence of severe caloric restriction  
72 and psychological stress, the gut microbiome itself has also been suggested to play a role in perpetuating  
73 symptoms of the disorder [27]. For example, individuals with AN have higher blood levels of caseinolytic-  
74 protease-B (ClpB), a protein produced by commensal gut species [26]. ClpB shares homology with the  
75 human anorexigenic  $\alpha$ -melanocyte-stimulating hormone ( $\alpha$ -MSH) and may therefore mimic its function to  
76 suppress appetite and increase energy expenditure [28].

77  
78 A contributory role of the gut microbiome in AN symptomatology was demonstrated when germ-free mice  
79 were inoculated with the gut microbiome derived from either healthy human donors or donors with AN [29].  
80 The mice who received the 'AN microbiome' showed reduced body weight and a concomitant reduction in  
81 food intake. Interestingly, when the 'AN microbiome' mice ate the same amount of food as the 'healthy  
82 microbiome' mice, they gained less weight suggesting they struggled to convert food into body mass [29].  
83 Furthermore, the 'AN microbiome' mice had reduced serotonin levels and displayed anxiety-related and  
84 compulsive behaviours [29]. Collectively, these findings highlight the gut microbiome as a potential mediator  
85 of disease in AN and a suitable target for therapeutic intervention.

86  
87 Current treatment approaches for AN are multidisciplinary and focus on nutritional rehabilitation, weight  
88 restoration, and cognitive behavioural therapy [30]. However, despite these efforts, approximately 30% of  
89 individuals will only partially recover from the disorder, with a further 20% maintaining a chronic course of  
90 illness over their lifetime [31]. Even after nutritional interventions and weight restoration, the gut microbiome  
91 in individuals with AN remains distinct from that of healthy individuals [16, 17], potentially contributing to  
92 relapse of symptoms [27]. Therefore, strategies designed to restore the gut microbiome in AN may be of  
93 clinical benefit when used in conjunction with current nutritional rehabilitation therapies, and warrant further  
94 investigation.

1  
2  
3 95  
4 96 Faecal microbiome transfer (FMT) involves the transfer of gut microbiota from healthy donors to recipients  
5 97 with gut dysbiosis. This therapy has proven highly effective for treating recurrent *Clostridioides difficile*  
6 98 infections, and can rapidly restore the diversity and functions of the gut microbiome in these patients [32].  
7 99 FMT has also been trialled in other disorders associated with less severe forms of gut dysbiosis, such as  
8 100 obesity [33–35], metabolic syndrome [36–39], inflammatory bowel disease [40], irritable bowel syndrome  
9 101 [41], and autism [42]. While FMT cannot cure these multi-faceted conditions, its ability to alter the gut  
10 102 microbiome has led to various therapeutic benefits among recipients including improvements in fat  
11 103 distribution [35], metabolic syndrome [35], insulin sensitivity [36, 37], intestinal permeability [43], gut  
12 104 inflammation [44], gastrointestinal symptoms [45], and social behaviours [42].  
13 105

14 106 Given the role of the gut microbiome in regulating appetite, mood, and metabolism [10–12], restoring the  
15 107 gut microbiome in individuals with AN may act as a stepping stone towards improved patient recovery. There  
16 108 have been two published case reports of FMT in patients with AN [46, 47]. In both instances, the patients  
17 109 showed an increase in gut microbiome diversity following FMT, however, metabolic improvements and  
18 110 weight restoration were only observed in one case [46]. Further research is therefore necessary to better  
19 111 understand whether FMT represents a viable treatment option for individuals with AN.  
20 112

21 113 The aim of this pilot study is to assess the feasibility of using FMT to help restore the gut microbiome in  
22 114 individuals with AN. Rather than using invasive FMT administration approaches with limited scalability, our  
23 115 study will employ validated methods for donor microbiome encapsulation [48, 49]. To help boost microbiome  
24 116 diversity, participants will receive an equal number of capsules from four donors who will be selected after  
25 117 extensive health and microbiome screening. Participants will be monitored for adverse events, have their  
26 118 gut microbiome profiled, and be clinically assessed for up to three months post-FMT.  
27 119

## 28 120 **METHODS**

### 29 121 **Study design**

30 122 This study is a one-arm, open-label pilot trial investigating the safety, tolerability, and potential of FMT to  
31 123 restore the gut microbiome in young females with AN. The study will be conducted at the Liggins Institute's  
32 124 Clinical Research Unit (University of Auckland), in Auckland, New Zealand.  
33 125

### 34 126 **Participants**

35 127 We aim to recruit 20 female participants aged 16–25 years who meet the DSM-5 criteria for AN and have a  
36 128 body mass index (BMI) 13–19 kg/m<sup>2</sup> (Table 1). Participants will be recruited through engagement with local  
37 129 eating disorder clinics, the Eating Disorders Association New Zealand (EDANZ), and social media. Study  
38 130 brochures and a detailed participant information sheet will be supplied to potential participants and their  
39 131 caregivers who are interested and considered eligible by their specialist physician. Participants will have the  
40 132 opportunity to ask any questions about the study before they decide to consent. Participants will be able to  
41 133 withdraw from the study at any time.  
42 60

**Table 1.** Eligibility criteria for participants and donors.

|                  | Participants                                                                                           | Donors                                                                                                                           |
|------------------|--------------------------------------------------------------------------------------------------------|----------------------------------------------------------------------------------------------------------------------------------|
| <b>Inclusion</b> |                                                                                                        |                                                                                                                                  |
|                  | Biological female at birth                                                                             | Biological female at birth                                                                                                       |
|                  | 16 - 25 years of age                                                                                   | 18 - 32 years of age                                                                                                             |
|                  | BMI 13 - 19 kg/m <sup>2</sup>                                                                          | BMI 18.5 - 25 kg/m <sup>2</sup>                                                                                                  |
|                  | Formal diagnosis of AN by an eating disorder specialist <sup>a</sup>                                   | Total body fat ≤33% (as assessed by DXA)                                                                                         |
|                  | Medically stable <sup>b</sup>                                                                          | Healthy diet (≥4 portions of fruit and/or vegetables/day)                                                                        |
|                  | Able and willing to swallow the treatment capsules                                                     | Regular exercise (moderate-to-vigorous physical activity for ≥3.5 hours/week)                                                    |
|                  | Able and willing to comply with the clinical assessments                                               | Regular bowel habit (passing stools at least once every two days)                                                                |
| <b>Exclusion</b> |                                                                                                        |                                                                                                                                  |
|                  | Known allergies to food and/or common medications                                                      | Positive screening test for any transmissible pathogen or multi-drug resistant organism listed in Table 2                        |
|                  | Use of antibiotics or probiotics in the month prior to treatment                                       | Gastrointestinal disease (e.g. inflammatory bowel disease, irritable bowel syndrome, coeliac disease, eosinophilic oesophagitis) |
|                  | Regular oral steroid treatment or daily application of potent topical steroids extensively to the body | Metabolic disorder (e.g. diabetes, metabolic syndrome, hypertension, dyslipidemia, dysglycaemia)                                 |
|                  | Compromised immune system                                                                              | Impaired fasting glucose (>5.9 mmol/l) or elevated HbA1c (>41 mmol/mol)                                                          |
|                  | Any chronic illness affecting gut or metabolic health                                                  | Asthma or eczema requiring regular prophylaxis or treatment                                                                      |
|                  | Thoughts of self-harm and/or suicide ideation <sup>c</sup>                                             | Autism spectrum conditions                                                                                                       |
|                  | Current or planned pregnancy during the course of the study                                            | Previous diagnosis of mental health issues including eating disorders                                                            |
|                  |                                                                                                        | Current or past history of malignancy                                                                                            |
|                  |                                                                                                        | Use of oral antibiotics or probiotic supplements in the past 3 months                                                            |
|                  |                                                                                                        | Regular binge drinking (>5 alcoholic standards/session at least once/week)                                                       |
|                  |                                                                                                        | Past or present use of recreational drugs, tobacco, or vaping                                                                    |
|                  |                                                                                                        | Current or past pregnancy                                                                                                        |
|                  |                                                                                                        | Overseas travel in the past two weeks <sup>d</sup>                                                                               |
|                  |                                                                                                        | UK residence in 1980-1996 for 6 months or longer <sup>e</sup>                                                                    |

<sup>a</sup> Meeting the DSM-5 criteria, 307.1

<sup>b</sup> In accordance with Starship Children's Hospital's clinical guidelines [50] (i.e., resting heart rate > 50 bpm; no postural drop in blood pressure or rise in heart rate, no electrolyte abnormalities, temperature >35°C and <37.8°C).

<sup>c</sup> Based on response to question 9 of the Patient Health Questionnaire-9 (PHQ9) [51].

<sup>d</sup> Donors who have travelled overseas will need to wait a minimum period of 2 weeks from their arrival back in New Zealand before donating.

<sup>e</sup> Due to the risk of variant Creutzfeldt-Jakob disease.

## 134 Donors

135 To minimise treatment heterogeneity, we will attempt to use the same four FMT donors throughout the  
 136 trial. We aim to recruit up to eight female stool donors to ensure we have sufficient reserve donors if one  
 137 becomes unwell, unavailable, or otherwise ineligible during the study. Donors will be recruited through  
 138 the University of Auckland's internal email list and via social media advertising. Potential donors will be  
 139 interviewed over the phone to assess general eligibility criteria (i.e., health and lifestyle parameters)  
 140 before being invited to our clinic for further screening. We will employ the same donor screening protocol  
 141 used in our previous FMT trial [52] (Table 1). Donors will be screened to ensure the absence of disease  
 142 and any transmissible viral, bacterial, or protozoal pathogens (Table 2). Donors will be given a detailed  
 143 participant information sheet to read, and will have the opportunity to ask any questions about the study  
 144 before they decide to consent. Donors will be able to withdraw from the study at any time. Any capsules  
 145 produced prior to withdrawal may be kept for use in the study.

146  
147 **Table 2.** Pathogen screening for donors.

|              | <b>Bacteria</b>                                                                                                                                                                                                                                                                                                                                                                                                                                                                                                                                                                                                                                                                   | <b>Parasites</b>                                                                                                                                                              | <b>Viruses</b>                                                                   |
|--------------|-----------------------------------------------------------------------------------------------------------------------------------------------------------------------------------------------------------------------------------------------------------------------------------------------------------------------------------------------------------------------------------------------------------------------------------------------------------------------------------------------------------------------------------------------------------------------------------------------------------------------------------------------------------------------------------|-------------------------------------------------------------------------------------------------------------------------------------------------------------------------------|----------------------------------------------------------------------------------|
| <b>Blood</b> | <i>Treponema pallidum</i> (syphilis)                                                                                                                                                                                                                                                                                                                                                                                                                                                                                                                                                                                                                                              | <i>Strongyloides</i> spp.*                                                                                                                                                    | Hepatitis A, B, C<br>HIV                                                         |
| <b>Stool</b> | <i>Campylobacter</i> spp.<br><i>Clostridioides difficile</i> toxin A/B<br>Diarrheagenic <i>Escherichia coli</i> /Shigella:<br>- Enteroaggregative <i>E. coli</i> (EAEC)<br>- Enteroinvasive <i>E. coli</i> (EIEC)<br>- Enteropathogenic <i>E. coli</i> (EPEC)<br>- Enterotoxigenic <i>E. coli</i> (ETEC)<br>- Shiga-like toxin-producing <i>E. coli</i> (STEC)<br><i>Helicobacter pylori</i><br>Multidrug-resistant organisms:<br>- Carbapenem-resistant organisms<br>- ESBL-producing Enterobacteriaceae<br>- Vancomycin-resistant <i>Enterococcus</i> spp.<br><i>Plesiomonas shigelloides</i><br><i>Salmonella</i> spp.<br><i>Vibrio</i> spp.<br><i>Yersinia enterocolitica</i> | <i>Cryptosporidium</i> spp.<br><i>Cyclospora cayetanensis</i><br><i>Entamoeba histolytica</i><br><i>Giardia lamblia</i><br>Microscopic examination<br>(ova, cysts, parasites) | Adenovirus F 40/41<br>Astrovirus<br>Norovirus GI/GII<br>Rotavirus A<br>Sapovirus |
| <b>Nasal</b> |                                                                                                                                                                                                                                                                                                                                                                                                                                                                                                                                                                                                                                                                                   |                                                                                                                                                                               | SARS-CoV-2                                                                       |

148 \* Only performed if the donor has a history of travel to the tropics.

## 150 Treatment

151 All participants will receive the same treatment. We will use a multi-donor FMT approach in which  
 152 recipients receive 20 capsules containing the gut microbiota from four healthy female donors (5 capsules  
 153 from each donor). Treatment will be spread over two days (10 capsules/day) or four days (5 capsules/day)  
 154 depending on the participant's preference. The total FMT dose corresponds to 10 g of concentrated gut  
 155 microbiota (2.5 g/donor).



1  
2  
3 156  
4 157 *FMT capsule preparation*  
5  
6 158 Donors will be asked to visit the Clinical Research Unit every six months to provide fresh stool samples  
7 159 for capsule production. Pathogen screening will be repeated for every capsule batch (Table 2). If multiple  
8 160 stool samples from the same donor are required for one batch of capsules, repeat screening will only be  
9 161 performed if it has been >2 weeks since their last pathogen screen. If any of the four selected donors fail  
10 162 their repeat screening, we will contact and invite one of the reserve donors for rescreening.  
11  
12  
13 163

14 164 We will use validated methods for gut microbiome encapsulation as described previously [52]. Donor  
15 165 stools will be processed individually for encapsulation. Immediately after donation, stool will be blended  
16 166 with 1:2 volumes of 0.9% saline solution and sieved to remove particulate matter. To remove any  
17 167 remaining particulate matter, the faecal slurry will be centrifuged (200x gravity, 5 min, room temperature).  
18 168 The resulting supernatant will be decanted into a fresh tube and centrifuged (5000x gravity, 15 min, room  
19 169 temperature) to concentrate the bacterial pellet. The bacterial pellet will be resuspended at a  
20 170 concentration of 1 g/ml in a cryoprotective solution (15% glycerol, 0.9% saline) and 500 µl aliquots will  
21 171 be dispensed into size 0 delayed release capsules (DRcaps™, Capsugel, Sydney, Australia). The size 0  
22 172 capsules will be closed and secondarily sealed in size 00 DRcaps™ capsules. DRcaps™ are specifically  
23 173 designed to mask taste and odour, resist stomach acid, and deliver their contents to the proximal bowel  
24 174 [53]. Capsules will be stored at -80°C for up to 6 months.  
25  
26  
27  
28  
29  
30 175

#### 31 176 *FMT capsule administration*

32 177 Treatment appointments will be scheduled for early morning and the participant will need to have fasted  
33 178 overnight for at least 8 hours. Given the high rates of laxative abuse in individuals with AN [54], we will  
34 179 not be performing a laxative bowel cleanse prior to FMT. Depending on the participant's preference, the  
35 180 capsule dose can be spread over two or four consecutive mornings. Capsules will be swallowed with  
36 181 water under direct supervision from a research nurse or clinician. Participants will be asked to postpone  
37 182 their breakfast until one hour after swallowing the capsules to help minimise the length of time the  
38 183 capsules will spend in the stomach.  
39  
40  
41  
42  
43  
44

#### 45 185 **Study schedule**

46 186 Participants will have an enrolment appointment where we will explain the study in detail, assess their  
47 187 eligibility, and obtain their written informed consent. During this visit, we will perform a whole-body dual-  
48 188 energy X-ray absorptiometry (DXA) scan and administer the Patient Health Questionnaire 9 (PHQ-9) to  
49 189 confirm they meet the BMI criteria and do not have feelings of self-harm/suicidal ideation. We will also  
50 190 collect a stool sample from the participant during this visit and schedule their baseline assessment for 3  
51 191 weeks time (Table 3). The first treatment dose will be scheduled on the same day or within a few days of  
52 192 their baseline assessment. Follow-up clinical assessments will be scheduled for 6 and 12 weeks after  
53 193 treatment. Participants will also be asked to collect a stool sample at home 3 weeks after their baseline  
54 194 assessment.  
55  
56  
57  
58  
59  
60

196 **Table 3.** Schedule of enrolment, treatment, and clinical assessments for study participants.

|                                 | Enrolment<br>3 weeks<br>before<br>baseline | Baseline<br>clinical<br>assessment | Treatment<br>spread<br>over 2 or 4<br>days | 1-<br>week | 3-<br>week | 6-week<br>clinical<br>assessment | 12-week<br>clinical<br>assessment |
|---------------------------------|--------------------------------------------|------------------------------------|--------------------------------------------|------------|------------|----------------------------------|-----------------------------------|
| Eligibility screen              | ✓                                          |                                    |                                            |            |            |                                  |                                   |
| Informed consent                | ✓                                          |                                    |                                            |            |            |                                  |                                   |
| FMT treatment                   |                                            |                                    | ✓                                          |            |            |                                  |                                   |
| Adverse events                  |                                            |                                    | ✓                                          | ✓          | ✓          | ✓                                | ✓                                 |
| Tolerability questionnaire      |                                            |                                    | ✓                                          |            |            |                                  |                                   |
| Background questionnaire        |                                            | ✓                                  |                                            |            |            |                                  |                                   |
| Eating disorder symptoms (EDEQ) |                                            | ✓                                  |                                            |            |            | ✓                                | ✓                                 |
| Depression symptoms (PHQ-9)     | ✓                                          | ✓                                  |                                            |            |            | ✓                                | ✓                                 |
| Anxiety symptoms (GAD-7)        |                                            | ✓                                  |                                            |            |            | ✓                                | ✓                                 |
| Stool sample                    | ✓                                          | ✓                                  |                                            |            | ✓          | ✓                                | ✓                                 |
| Blood sample                    |                                            | ✓                                  |                                            |            |            | ✓                                | ✓                                 |
| Body composition scan (DXA)     | ✓                                          |                                    |                                            |            |            |                                  | ✓                                 |

197 DXA, dual-energy X-ray absorptiometry; EDEQ, Eating Disorder Examination Questionnaire; FMT, faecal microbiome transfer;  
 198 GAD-7, General Anxiety Disorder 7-item scale; PHQ-9, Patient Health Questionnaire 9.

## 200 Data collection and follow-up

### 201 *Stool sample collection*

202 Stool samples will be collected from participants 3 weeks before treatment, at baseline, and 3, 6, and 12  
 203 weeks after treatment to assess changes in the gut microbiome, metabolome, and levels of intestinal  
 204 inflammation. Where possible, stool samples will be collected on site except for the “3 weeks before” and  
 205 “3 weeks after” treatment samples which the participant will collect at home. If a participant cannot  
 206 produce a stool sample during their clinical assessment visit, they will be given a stool collection kit to  
 207 take home. Collection kits contain a stool catcher, disposable gloves, specimen bag, specimen pottle,  
 208 DNA/RNA Shield Fecal Collection tube (#R1101, Zymo Research, Irvine, California, USA), and a step-  
 209 by-step instruction card. If the sample is collected at home, participants will be asked to store their  
 210 samples within their home freezer until their next appointment or arrange for collection by a member of  
 211 the research team. Upon receipt, stool samples will be aliquoted and stored in -80°C freezers at Te Ira  
 212 Kāwai – Auckland Regional Biobank. Stool collected in the DNA/RNA Shield Fecal Collection tube will be  
 213 reserved for gut microbiome assessment. Stool collected in the specimen pottle (i.e. not containing any  
 214 stabilization buffer) will be reserved for metabolomics and intestinal inflammation assays (e.g.  
 215 calprotectin, lactoferrin, and S100A12 [55]).

### 217 *Gut microbiome profiling*

218 DNA and RNA will be extracted using the ZymoBIOMICS MagBead DNA/RNA kit (Zymo Research,  
 219 #R2136) according to the manufacturer’s instructions with the addition of a bead bashing lysis step (Zymo  
 220 Research, #S6002-96-3). Shotgun metagenomic and metatranscriptomic sequencing will be performed  
 221 by a commercial provider using Illumina’s paired-end sequencing technology. Sequencing data will be  
 222 processed as performed previously [49], using bioBakery tools for meta’omic profiling [56]. In particular,

223 StrainPhiAn [57] will be used to generate single nucleotide polymorphism (SNP) haplotypes representing  
 224 the dominant strain of any given species within a sample. We will use these SNP haplotypes to compare  
 225 the genetic similarity of donor and recipient strains before and after treatment to assess the proportion  
 226 and stability of donor strain engraftment.

#### 228 *Blood sample collection*

229 Blood samples will be collected at baseline, 6 weeks, and 12 weeks after treatment to assess nutritional  
 230 status and liver/thyroid function (Table 4). A subset of these tests will be performed in real-time throughout  
 231 the study period for safety monitoring. These tests will also be repeated at the completion of study for  
 232 evaluation of study outcomes, avoiding any potential batch effects.

234 **Table 4.** Blood test schedule for all clinical assessment visits (baseline, week 6, week 12).

|                                   | Safety monitoring | Study outcomes |
|-----------------------------------|-------------------|----------------|
| Electrolytes (Sodium, Potassium)  | ✓                 | ✓              |
| Creatinine                        | ✓                 | ✓              |
| Ferritin                          | ✓                 | ✓              |
| Total protein                     | ✓                 | ✓              |
| Albumin                           | ✓                 | ✓              |
| Alkaline phosphatase (ALP)        | ✓                 | ✓              |
| Alanine aminotransferase (ALT)    | ✓                 | ✓              |
| Gamma-glutamyl transferase (GGT)  | ✓                 | ✓              |
| Aspartate aminotransferase (AST)  |                   | ✓              |
| Folate                            |                   | ✓              |
| Vitamin B12                       |                   | ✓              |
| Cortisol                          |                   | ✓              |
| Free thyroxine                    |                   | ✓              |
| Thyroid stimulating hormone (TSH) |                   | ✓              |
| Serotonin (5-HT)                  |                   | ✓              |

#### 236 *Anthropometry and body composition*

237 Anthropometric and body composition measurements are potentially triggering for people with AN.  
 238 Discussions and feedback from eating disorder specialists and recovered individuals have confirmed that  
 239 regular body weight measurements (specifically standing on scales) throughout the study could cause  
 240 unnecessary stress for participants given the primary focus of the study is on gut microbiome restoration.  
 241 However, anthropometry and body composition measurements are important for safety monitoring and  
 242 detection of potential adverse events. Therefore, a DXA scan will be performed at enrolment and 12  
 243 weeks after treatment to assess body weight and composition (including the proportion of lean mass, fat  
 244 mass, and bone mineral density). We will also measure participants' height barefoot using a wall-mounted  
 245 stadiometer and combine this information with the DXA-generated body weights to calculate BMI.

#### 247 *Questionnaires*

248 All questionnaires will be completed by the participants online using data capture tools from the web-  
 249 based research platform, REDCap (Research Electronic Data Capture), hosted in secure servers at the

1  
2  
3 250 University of Auckland. At the beginning of the study, we will collect background demographic information  
4 251 from participants including their age, sex assigned at birth, gender identity, self-reported ethnicity,  
5 252 socioeconomic status (based on physical address), age when first diagnosed with AN, and current  
6 253 medications. Socioeconomic status will be estimated using the New Zealand Indices of Multiple  
7 254 Deprivation [58].  
8  
9

10 255  
11 256 After their final dose of capsules, participants will complete a short questionnaire to gather their views  
12 257 and experience of taking the treatment. Specifically, participants will be asked how difficult it was to  
13 258 swallow the capsules, whether they experienced any unpleasant side effects during and/or after  
14 259 swallowing the capsules, and whether they would consider taking the treatment again if it was later shown  
15 260 to be beneficial for recovery.  
16  
17  
18

19 261  
20 262 Participants will also complete three established health questionnaires at baseline, 6 weeks, and 12  
21 263 weeks after treatment; 1) Eating Disorder Examination Questionnaire (EDEQ v6.0) [59], 2) Patient Health  
22 264 Questionnaire 9 (PHQ-9) for symptoms of depression [51], and 3) General Anxiety Disorder 7-item scale  
23 265 (GAD-7) [60].  
24  
25  
26

27 266  
27 267 **Safety monitoring**  
28  
29 268 By adopting strict selection criteria for donors, we will reduce the risk of infection via FMT by minimising  
30 269 the potential transmission of pathogenic organisms. Participants will take each dose of FMT in our clinic  
31 270 under the supervision of a research clinician and/or nurse, where they will remain under close monitoring  
32 271 for at least one hour afterwards. Based on our previous experience and existing evidence, it is unlikely  
33 272 that participants will experience any severe adverse events [35]. However, participants will be instructed  
34 273 to seek immediate medical attention if they develop any severe adverse reactions following treatment.  
35 274 We will contact participants 24 hours after ingestion of each set of capsules, as well as 1, 3, 6, and 12  
36 275 weeks after treatment to enquire about any adverse side effects. Specifically, participants will be asked  
37 276 to report on the following events: loose or bloody stools, abdominal pain, vomiting, nausea, constipation,  
38 277 flatulence, bloating, fever, malodorous burps, flu-like symptoms, allergic symptoms, appetite, fatigue, and  
39 278 agitation. Adverse events will be graded in accordance with Common Terminology Criteria for Adverse  
40 279 Events v4.0 (CTCAE)[61].  
41  
42  
43  
44  
45  
46

47 280  
47 281 In addition, we will monitor blood markers of nutritional status and liver function (Table 4), any available  
48 282 body weight records as provided by the participant's clinical care team, and questionnaire scores  
49 283 throughout the study in case any of the participants' health starts deteriorating. If the participant answers  
50 284 "several days", "more than half the days" or "nearly every day" to PHQ-9, question 9 "Thoughts that you  
51 285 would be better off dead or of hurting yourself in some way", the research clinician will interview the  
52 286 participant further and provide them with safety management information to take home. Before the  
53 287 participant leaves the clinic, the research clinician will also recommend clinical follow-up and contact the  
54 288 participant's routine care provider and/or the research psychiatrist to ensure additional mental health  
55 289 support is provided.  
56  
57  
58  
59  
60

290 These clinical and adverse event data will be reviewed by an independent data monitoring committee  
291 (DMC) who can decide to stop the trial if the safety of participants is thought to have been compromised.  
292 Any serious adverse event or clinical result will be notified immediately to the DMC.

294 We will strongly advise participants to bring a support person to their study appointments. The support  
295 person could be a family member, friend, or member of their support team. Following discussions with  
296 our advisers, this person would support the participant during and after the clinic visits, provide comfort  
297 and reassurance to the participant throughout the study, and act as an additional point of contact in case  
298 the participant becomes uncontactable during the study period.

## 300 **Outcomes**

### 301 *Primary outcome*

- 302 • A shift in gut microbiome composition at 3 weeks post-FMT. The shift should exceed the drift in  
303 gut microbiome composition measured over the 3 weeks between enrolment and baseline.

### 305 *Secondary outcomes*

- 306 • Adverse events associated with FMT treatment
- 307 • Proportion of participants who swallow all 20 treatment capsules
- 308 • Proportion of participants who would consider having the treatment again if effective
- 309 • Gut microbiome composition and functional potential at 6, and 12 weeks post-FMT
- 310 • Donor strain engraftment at 3, 6, and 12 weeks post-FMT
- 311 • Intestinal inflammation at 6 and 12 weeks post-FMT
- 312 • Blood markers of nutritional status and liver/thyroid function at 6 and 12 weeks post-FMT
- 313 • Eating disorder symptoms at 6 and 12 weeks post-FMT
- 314 • Depression symptoms at 6 and 12 weeks post-FMT
- 315 • Anxiety symptoms at 6 and 12 weeks post-FMT
- 316 • BMI at 12 weeks post-FMT
- 317 • Body composition at 12 weeks post-FMT

## 319 **Sample size calculation**

320 Our primary outcome is a shift in the gut microbiome composition at 3 weeks post-FMT. Because we do  
321 not have a control group to compare against, we will instead collect a stool sample 3 weeks prior to FMT  
322 to assess the background drift in the gut microbiome over a 3 week period without any intervention. We  
323 will use the Bray-Curtis dissimilarity index to compare gut microbiome composition profiles between  
324 sampling time points and test for a difference in these values using a paired t-test. To identify a shift in  
325 the gut microbiome above background drift, we will need 18 participants (80% power, alpha = 0.05). This  
326 calculation was based on data from our previous FMT trial [35] comparing the gut microbiome shifts  
327 between 39 FMT and 44 placebo recipients over 6 weeks (Bray-Curtis dissimilarity to baseline; FMT  
328 mean 0.574, Placebo mean 0.416, delta = 0.158, SD = 0.163, t-test p = 2.754e-06). To account for a  
329 potential dropout rate of 10%, we aim to recruit 20 participants.

1  
2  
3 330  
4 331 **Statistical analyses**  
5  
6 332 We will perform both intention-to-treat and per-protocol analyses. Per-protocol analyses will only include  
7 333 data from those that complete the full treatment dose. Baseline demographics and clinical characteristics  
8 334 will be summarized using descriptive statistics. Gut microbiome shifts will be assessed by calculating the  
9 335 Bray-Curtis dissimilarity index to and from baseline using species-level relative abundance profiles. To  
10 336 assess the primary outcome, a two-sided paired t-test will compare the potential shift in gut microbiome  
11 337 composition 3 weeks before treatment to the shift 3 weeks after treatment. No imputation will be  
12 338 performed for missing data, and statistical significance will be set at  $p < 0.05$ .

13 339  
14 340 Multivariate Association with Linear Models (MaAsLin2) will be used to examine changes in the relative  
15 341 abundances of microbial taxa and their encoded functions in response to treatment. We will also use  
16 342 MaAsLin2 to explore associations between microbiome features and clinical outcomes.

17 343  
18 344 Changes in clinical outcomes from baseline will be assessed using paired t-tests (parametric) or Wilcoxon  
19 345 signed rank tests (non-parametric), as appropriate. However, we acknowledge that we cannot make any  
20 346 treatment efficacy claims based on these paired within-group analyses and without a control group.

21 347  
22 348 **Patient and public involvement**  
23 349 This study has been co-designed in consultation with members from the Eating Disorders Association  
24 350 New Zealand (EDANZ) as well as women who have previously recovered from AN. These discussions  
25 351 ensured the study was designed appropriately to minimise participant stress and burden. The study  
26 352 protocol, participant information sheet, and recruitment material have all been reviewed by EDANZ and  
27 353 our study advisors. EDANZ has also offered to support in recruitment for the study by posting on their  
28 354 social media platforms and recommending local clinics and services for us to contact.

29 355

## 30 356 **ETHICS AND DISSEMINATION**

### 31 357 **Ethics approval**

32 358 Ethics approval for the study was granted by the Central Health and Disability Ethics Committee  
33 359 (reference number: 21/CEN/212). The study protocol adheres to the ethical guidelines outlined in the  
34 360 Declaration of Helsinki [62]. All participants will provide written informed consent before participating in  
35 361 the study.

36 362  
37 363 **Data management**  
38 364 Each participant in the study will be given a unique de-identified study ID that will be used to label all their  
39 365 data and samples collected throughout the study. All recorded clinical data will be entered and stored in  
40 366 the web-based platform REDCap, which is hosted in secure servers at the University of Auckland. Access  
41 367 to these data will be restricted to the members of the research team. Clinical data will be stored for a  
42 368 minimum period of 10 years. Biological samples (i.e., stool and blood samples) will be securely stored for  
43 369 up to five years in  $-80^{\circ}\text{C}$  freezers at Te Ira Kāwai - Auckland Regional Biobank, with access restricted to

1  
2  
3 370 members of the research team for the purposes of this study only. All study personnel involved in data  
4 371 and tissue collection will be trained in good clinical practice (GCP), study protocol, and collection  
5 372 requirements. Participants will have the right to access and correct their personal data without being  
6 373 withdrawn from the study. If a participant withdraws from the study, any samples or data collected prior  
7 374 to withdrawal will continue to be used and included in the study.  
8  
9

10 375

### 11 376 **Data availability**

12 377 At the completion of the study, the de-identified post-filtered metagenomic sequencing data will be made  
13 378 publicly available on NCBI's sequence read archive (SRA). Note that this data set does not contain human  
14 379 DNA sequences. The de-identified clinical data may be made available for future research upon valid  
15 380 requests to the Liggins Institute Clinical Data Research Hub Data Access Committee. Requestors will  
16 381 need to provide a methodologically sound proposal, obtain appropriate ethics approval, and sign a Data  
17 382 Access Agreement. The Data Access Agreement will include a commitment to using the data only for the  
18 383 specified proposal, not to attempt to identify any individual participants, to securely store and use the  
19 384 data, and to destroy or return the data after completion of the project. Information on data sharing will be  
20 385 provided in the participant information sheet and will be listed in the consent form.  
21  
22  
23  
24  
25

26 386

### 27 387 **Dissemination**

28  
29 388 Findings from this study will be communicated to the scientific community through publications in peer-  
30 389 reviewed journals and presentations at relevant conferences and meetings. Study participants will be  
31 390 informed of the study findings as soon as the results become available. Study findings will also be  
32 391 presented to EDANZ and interested participant care providers. In addition, we will communicate our  
33 392 findings with the general public through liaison with the Liggins Institute's communications manager.  
34  
35  
36  
37

36 393

## 38 394 **ACKNOWLEDGMENTS**

39  
40 395 The authors would like to thank Nicki Wilson on behalf of Eating Disorders Association New Zealand  
41 396 (EDANZ) as well as Genevieve Mora, Emma Wilson, Rebecca Slykerman, and Russell Walmsley for  
42 397 helpful conversations and their valuable feedback on the study design. The authors would also like to  
43 398 thank the Liggins Institute's Māori Advisory Group and Keri Opai from Wise Group for helping to develop  
44 399 the study framework with Māori perspectives. We are very grateful to the Rockfield Trust for their  
45 400 generous donation to fund this study.  
46  
47  
48  
49

49 401

## 51 402 **AUTHOR CONTRIBUTIONS**

52  
53 403 Funding acquisition: WC, JO

54 404 Consultation: BW, JD, BA, KL, CC, MD, HT, WC, JO

55 405 Study design: BW, JD, BA, KL, RT, CC, MD, TE, TV, HT, WC, JO

56 406 Ethics application: BW, JD, BA, KL, TE, TV, HT, WC, JO

57 407 Protocol drafting: BW

58 408 Protocol revision: BW, JD, BA, KL, RT, CC, MD, TE, TV, HT, WC, JO  
59  
60

1  
2  
3 409

4  
5 410 **CONFLICTS OF INTERESTS**

6  
7 411 The authors have no conflicts of interest to declare.

8 412

9  
10 413 **FUNDING**

11  
12 414 This study is fully funded by the Rockfield Trust. The funders had no involvement in the design of the  
13 415 study, and will have no involvement in the collection, analyses, interpretation of data, or in the writing or  
14 416 decision to publish the manuscript on study findings.  
15  
16  
17  
18  
19  
20  
21  
22  
23  
24  
25  
26  
27  
28  
29  
30  
31  
32  
33  
34  
35  
36  
37  
38  
39  
40  
41  
42  
43  
44  
45  
46  
47  
48  
49  
50  
51  
52  
53  
54  
55  
56  
57  
58  
59  
60



417 **REFERENCES**

- 418 1. Breton, J., Déchelotte, P., & Ribet, D. (2019). Intestinal microbiota and anorexia nervosa.  
419 *Clinical Nutrition Experimental*, 28: 11–21.
- 420 2. Arcelus, J., Mitchell, A.J., Wales, J., & Nielsen, S. (2011). Mortality rates in patients with  
421 anorexia nervosa and other eating disorders: A meta-analysis of 36 studies. *Archives of General*  
422 *Psychiatry*, 68(7): 724–731.
- 423 3. Fernandez-Aranda, F., Pinheiro, A.P., Tozzi, F., et al (2007). Symptom profile of major  
424 depressive disorder in women with eating disorders. *Australian and New Zealand Journal of*  
425 *Psychiatry*, 41(1): 24–31.
- 426 4. Hetterich, L., Mack, I., Giel, K.E., et al (2019). An update on gastrointestinal disturbances in  
427 eating disorders. *Molecular and Cellular Endocrinology*, 497: 110318.
- 428 5. Kaye, W.H., Bulik, C.M., Thornton, L., et al (2004). Comorbidity of anxiety disorders with  
429 anorexia and bulimia nervosa. *The American Journal of Psychiatry*, 161(12): 2215–2221.
- 430 6. Galmiche, M., Déchelotte, P., Lambert, G., & Tavolacci, M.P. (2019). Prevalence of eating  
431 disorders over the 2000-2018 period: A systematic literature review. *American Journal of Clinical*  
432 *Nutrition*, 109(5): 1402–1413.
- 433 7. Rikani, A.A., Choudhry, Z., Choudhry, A.M., et al (2013). A critique of the literature on etiology of  
434 eating disorders. *Annals of Neurosciences*, 20(4): 157–161.
- 435 8. Duncan, L., Yilmaz, Z., Gaspar, H., et al (2017). Significant locus and metabolic genetic  
436 correlations revealed in genome-wide association study of anorexia nervosa. *The American*  
437 *Journal of Psychiatry*, 174(9): 850–858.
- 438 9. Watson, H.J., Yilmaz, Z., Thornton, L.M., et al (2019). Genome-wide association study identifies  
439 eight risk loci and implicates metabo-psychiatric origins for anorexia nervosa. *Nature Genetics*,  
440 51(8): 1207–1214.
- 441 10. Fetissov, S.O. (2017). Role of the gut microbiota in host appetite control: Bacterial growth to  
442 animal feeding behaviour. *Nature Reviews Endocrinology*, 13(1): 11–25.
- 443 11. Visconti, A., Le Roy, C.I., Rosa, F., et al (2019). Interplay between the human gut microbiome  
444 and host metabolism. *Nature Communications*, 10(1): 1–10.
- 445 12. Martin, A.M., Sun, E.W., Rogers, G.B., & Keating, D.J. (2019). The influence of the gut  
446 microbiome on host metabolism through the regulation of gut hormone release. *Frontiers in*  
447 *Physiology*, 10: 428.
- 448 13. Glenny, E.M., Bulik-Sullivan, E.C., Tang, Q., et al (2017). Eating disorders and the intestinal  
449 microbiota: Mechanisms of energy homeostasis and behavioral influence. *Current Psychiatry*  
450 *Reports*, 19(8): 51.
- 451 14. Armougom, F., Henry, M., Vialettes, B., et al (2009). Monitoring bacterial community of human  
452 gut microbiota reveals an increase in *Lactobacillus* in obese patients and *Methanogens* in  
453 anorexic patients. *PLOS ONE*, 4(9): e7125.
- 454 15. Morita, C., Tsuji, H., Hata, T., et al (2015). Gut dysbiosis in patients with anorexia nervosa.  
455 *PLOS ONE*, 10(12): e0145274.
- 456 16. Kleiman, S.C., Watson, H.J., Bulik-Sullivan, E.C., et al (2015). The intestinal microbiota in acute

- 1  
2  
3 457 anorexia nervosa and during renourishment: Relationship to depression, anxiety, and eating  
4 458 disorder psychopathology. *Psychosomatic Medicine*, 77(9): 969–981.
- 5  
6 459 17. Mack, I., Cuntz, U., Grmer, C., et al (2016). Weight gain in anorexia nervosa does not ameliorate  
7 460 the faecal microbiota, branched chain fatty acid profiles, and gastrointestinal complaints.  
8 461 *Scientific Reports*, 6: 26752.
- 9  
10 462 18. Borgo, F., Riva, A., Benetti, A., et al (2017). Microbiota in anorexia nervosa: The triangle  
11 463 between bacterial species, metabolites and psychological tests. *PLOS ONE*, 12(6): e0179739.
- 12  
13 464 19. Mörkl, S., Lackner, S., Müller, W., et al (2017). Gut microbiota and body composition in anorexia  
14 465 nervosa inpatients in comparison to athletes, overweight, obese, and normal weight controls.  
15 466 *International Journal of Eating Disorders*, 50(12): 1421–1431.
- 16  
17 467 20. Million, M., Angelakis, E., Maraninchi, M., et al (2013). Correlation between body mass index  
18 468 and gut concentrations of *Lactobacillus reuteri*, *Bifidobacterium animalis*, *Methanobrevibacter*  
19 469 *smithii* and *Escherichia coli*. *International Journal of Obesity*, 37(11): 1460–1466.
- 20  
21 470 21. Camilleri, M. (2019). Leaky gut: mechanisms, measurement and clinical implications in humans.  
22 471 *Gut*, 68(8): 1516–1526.
- 23  
24 472 22. Seitz, J., Belheouane, M., Schulz, N., et al (2019). The impact of starvation on the microbiome  
25 473 and gut-brain interaction in anorexia nervosa. *Frontiers in Endocrinology*, 10: 41.
- 26  
27 474 23. Monteleone, P., Carratù, R., Carteni, M., et al (2004). Intestinal permeability is decreased in  
28 475 anorexia nervosa. *Molecular Psychiatry*, 9(1): 76–80.
- 29  
30 476 24. Achamrah, N., Nobis, S., Breton, J., et al (2016). Maintaining physical activity during refeeding  
31 477 improves body composition, intestinal hyperpermeability and behavior in anorectic mice.  
32 478 *Scientific Reports*, 6(1): 1–15.
- 33  
34 479 25. Jésus, P., Ouelaa, W., François, M., et al (2014). Alteration of intestinal barrier function during  
35 480 activity-based anorexia in mice. *Clinical Nutrition*, 33(6): 1046–1053.
- 36  
37 481 26. Breton, J., Legrand, R., Akkermann, K., et al (2016). Elevated plasma concentrations of bacterial  
38 482 ClpB protein in patients with eating disorders. *International Journal of Eating Disorders*, 49(8):  
39 483 805–808.
- 40  
41 484 27. Ghenciulescu, A., Park, R.J., & Burnet, P.W.J. (2021). The gut microbiome in anorexia nervosa:  
42 485 friend or foe? *Frontiers in Psychiatry*, 11: 611677.
- 43  
44 486 28. Molfino, A., Amabile, M.I., Imbimbo, G., et al (2020). Plasma enterobacterial ClpB levels and  
45 487 ClpB- and  $\alpha$ -MSH-reactive immunoglobulins in lung cancer patients with and without anorexia.  
46 488 *Nutrition*, 78: 110952.
- 47  
48 489 29. Hata, T., Miyata, N., Takakura, S., et al (2019). The gut microbiome derived from anorexia  
49 490 nervosa patients impairs weight gain and behavioral performance in female mice.  
50 491 *Endocrinology*, 160(10): 2441–2452.
- 51  
52 492 30. Ruusunen, A., Rocks, T., Jacka, F., & Loughman, A. (2019). The gut microbiome in anorexia  
53 493 nervosa: relevance for nutritional rehabilitation. *Psychopharmacology*, 236(5): 1545–1558.
- 54  
55 494 31. NZ Eating Disorders Clinic Anorexia Nervosa. [https://www.nzeatingdisordersclinic.co.nz/eating-](https://www.nzeatingdisordersclinic.co.nz/eating-disorders/anorexia-nervosa/)  
56 495 [disorders/anorexia-nervosa/](https://www.nzeatingdisordersclinic.co.nz/eating-disorders/anorexia-nervosa/). Accessed 17 Nov 2020
- 57  
58 496 32. Cammarota, G., Ianiro, G., & Gasbarrini, A. (2014). Fecal microbiota transplantation for the  
59 497 treatment of *Clostridium difficile* infection: a systematic review. *Journal of Clinical*

- 1  
2  
3 498 *Gastroenterology*, 48(8): 693–702.
- 4 499 33. Yu, E.W., Gao, L., Stastka, P., et al (2020). Fecal microbiota transplantation for the improvement  
5 500 of metabolism in obesity: The FMT-TRIM double-blind placebo-controlled pilot trial. *PLOS*  
6 501 *Medicine*, 17(3): e1003051.
- 7 502 34. Allegretti, J.R., Kassam, Z., Hurtado, J., et al (2021). Impact of fecal microbiota transplantation  
8 503 with capsules on the prevention of metabolic syndrome among patients with obesity. *Hormones*,  
9 504 20: 209–211.
- 10 505 35. Leong, K.S.W., Jayasinghe, T.N., Wilson, B.C., et al (2020). Effects of fecal microbiome transfer  
11 506 in adolescents with obesity: the gut bugs randomized controlled trial. *JAMA Network Open*,  
12 507 3(12): e2030415.
- 13 508 36. Vrieze, A., Van Nood, E., Holleman, F., et al (2012). Transfer of intestinal microbiota from lean  
14 509 donors increases insulin sensitivity in individuals with metabolic syndrome. *Gastroenterology*,  
15 510 143(4): 913-916.e7.
- 16 511 37. Kootte, R.S., Levin, E., Salojärvi, J., et al (2017). Improvement of insulin sensitivity after lean  
17 512 donor feces in metabolic syndrome is driven by baseline intestinal microbiota composition. *Cell*  
18 513 *Metabolism*, 26(4): 611-619.e6.
- 19 514 38. Smits, L.P., Kootte, R.S., Levin, E., et al (2018). Effect of vegan fecal microbiota transplantation  
20 515 on carnitine- and choline-derived trimethylamine-N-oxide production and vascular inflammation  
21 516 in patients with metabolic syndrome. *Journal of the American Heart Association*, 7(7): e008342.
- 22 517 39. de Groot, P., Scheithauer, T., Bakker, G.J., et al (2019). Donor metabolic characteristics drive  
23 518 effects of faecal microbiota transplantation on recipient insulin sensitivity, energy expenditure  
24 519 and intestinal transit time. *Gut*, 69(3): 502–512.
- 25 520 40. Paramsothy, S., Paramsothy, R., Rubin, D.T., et al (2017). Faecal microbiota transplantation for  
26 521 inflammatory bowel disease: a systematic review and meta-analysis. *Journal of Crohn's and*  
27 522 *Colitis*, 11(10): 1180–1199.
- 28 523 41. Ianiro, G., Eusebi, L.H., Black, C.J., et al (2019). Systematic review with meta-analysis: efficacy  
29 524 of faecal microbiota transplantation for the treatment of irritable bowel syndrome. *Alimentary*  
30 525 *Pharmacology and Therapeutics*, 50(3): 240–248.
- 31 526 42. Kang, D.-W., Adams, J.B., Gregory, A.C., et al (2017). Microbiota transfer therapy alters gut  
32 527 ecosystem and improves gastrointestinal and autism symptoms: an open-label study.  
33 528 *Microbiome*, 5(1): 10.
- 34 529 43. Craven, L., Rahman, A., Nair Parvathy, S., et al (2020). Allogenic fecal microbiota  
35 530 transplantation in patients with nonalcoholic fatty liver disease improves abnormal small  
36 531 intestinal permeability: a randomized control trial. *American Journal of Gastroenterology*, 115(7):  
37 532 1055–1065.
- 38 533 44. Paramsothy, S., Kamm, M.A., Kaakoush, N.O., et al (2017). Multidonor intensive faecal  
39 534 microbiota transplantation for active ulcerative colitis: a randomised placebo-controlled trial. *The*  
40 535 *Lancet*, 389(10075): 1218–1228.
- 41 536 45. Tian, H., Ge, X., Nie, Y., et al (2017). Fecal microbiota transplantation in patients with slow-  
42 537 transit constipation: a randomized, clinical trial. *PLOS ONE*, 12(2): e0171308.
- 43 538 46. de Clercq, N.C., Frissen, M.N., Davids, M., et al (2019). Weight gain after fecal microbiota

- 1  
2  
3 539 transplantation in a patient with recurrent underweight following clinical recovery from anorexia  
4 540 nervosa. *Psychotherapy and Psychosomatics*, 88(1): 58–60.
- 5  
6 541 47. Prochazkova, P., Roubalova, R., Dvorak, J., et al (2019). Microbiota, microbial metabolites, and  
7 542 barrier function in a patient with anorexia nervosa after fecal microbiota transplantation.  
8 543 *Microorganisms*, 7(9): 338.
- 9  
10 544 48. Youngster, I., Russell, G.H., Pindar, C., et al (2014). Oral, capsulized, frozen fecal microbiota  
11 545 transplantation for relapsing *Clostridium difficile* infection. *JAMA*, 312(17): 1772.
- 12  
13 546 49. Wilson, B.C., Vatanen, T., Jayasinghe, T.N., et al (2021). Strain engraftment competition and  
14 547 functional augmentation in a multi-donor fecal microbiota transplantation trial for obesity.  
15 548 *Microbiome*, 9(1): 107.
- 16  
17 549 50. Starship (2019). Eating Disorders - management of.  
18 550 <https://www.starship.org.nz/guidelines/eating-disorders-management-of/>. Accessed 20 May  
19 551 2021
- 20  
21 552 51. Kroenke, K., Spitzer, R.L., & Williams, J.B.W. (2001). The PHQ-9: Validity of a brief depression  
22 553 severity measure. *Journal of General Internal Medicine*, 16(9): 606–613.
- 23  
24 554 52. Leong, K.S.W., Jayasinghe, T.N., Derraik, J.G.B., et al (2019). Protocol for the Gut Bugs Trial: a  
25 555 randomised double-blind placebo-controlled trial of gut microbiome transfer for the treatment of  
26 556 obesity in adolescents. *BMJ Open*, 9(4): e026174.
- 27  
28 557 53. DRcaps® Delayed Release Capsules | Capsugel. [https://www.capsugel.com/consumer-health-](https://www.capsugel.com/consumer-health-nutrition-products/drcaps-capsules)  
29 558 [nutrition-products/drcaps-capsules](https://www.capsugel.com/consumer-health-nutrition-products/drcaps-capsules). Accessed 19 Nov 2020
- 30  
31 559 54. Elran-Barak, R., Goldschmidt, A.B., Crow, S.J., et al (2017). Is laxative misuse associated with  
32 560 binge eating? Examination of laxative misuse among individuals seeking treatment for eating  
33 561 disorders. *International Journal of Eating Disorders*, 50(9): 1114–1118.
- 34  
35 562 55. Lopez, R.N., Leach, S.T., Lemberg, D.A., et al (2017). Fecal biomarkers in inflammatory bowel  
36 563 disease. *Journal of Gastroenterology and Hepatology*, 32(3): 577–582.
- 37  
38 564 56. McIver, L.J., Abu-Ali, G., Franzosa, E.A., et al (2018). BioBakery: A meta'omic analysis  
39 565 environment. *Bioinformatics*, 34(7): 1235–1237.
- 40  
41 566 57. Truong, D.T., Tett, A., Pasolli, E., et al (2017). Microbial strain-level population structure &  
42 567 genetic diversity from metagenomes. *Genome Research*, 27(4): 626–638.
- 43  
44 568 58. Exeter, D.J., Zhao, J., Crengle, S., et al (2017). The New Zealand Indices of Multiple Deprivation  
45 569 (IMD): A new suite of indicators for social and health research in Aotearoa, New Zealand. *PLOS*  
46 570 *ONE*, 12(8): e0181260.
- 47  
48 571 59. Fairburn, C.G., & Beglin, S.J. (2008). Eating Disorder Examination Questionnaire (6.0). In  
49 572 Fairburn CG. Cognitive Behavior Therapy and Eating Disorders. Guilford Press, New York
- 50  
51 573 60. Löwe, B., Decker, O., Müller, S., et al (2008). Validation and standardization of the generalized  
52 574 anxiety disorder screener (GAD-7) in the general population. *Medical Care*, 46(3): 266–274.
- 53  
54 575 61. National Cancer Institute (2009). Common Terminology Criteria for Adverse Events (CTCAE)  
55 576 Version 4.0.
- 56  
57 577 62. World Medical Association (2013). World Medical Association declaration of Helsinki: Ethical  
58 578 principles for medical research involving human subjects. *JAMA*, 310(20): 2191–2194.
- 59  
60 579

# Reporting checklist for protocol of a clinical trial.

Based on the SPIRIT guidelines.

## Instructions to authors

Complete this checklist by entering the page numbers from your manuscript where readers will find each of the items listed below.

Your article may not currently address all the items on the checklist. Please modify your text to include the missing information. If you are certain that an item does not apply, please write "n/a" and provide a short explanation.

Upload your completed checklist as an extra file when you submit to a journal.

In your methods section, say that you used the SPIRIT reporting guidelines, and cite them as:

Chan A-W, Tetzlaff JM, Gøtzsche PC, Altman DG, Mann H, Berlin J, Dickersin K, Hróbjartsson A, Schulz KF, Parulekar WR, Krleža-Jerić K, Laupacis A, Moher D. SPIRIT 2013 Explanation and Elaboration: Guidance for protocols of clinical trials. *BMJ*. 2013;346:e7586

|                                             |                     | Reporting Item                                                                                               | Page Number |
|---------------------------------------------|---------------------|--------------------------------------------------------------------------------------------------------------|-------------|
| <b>Administrative information</b>           |                     |                                                                                                              |             |
| Title                                       | <a href="#">#1</a>  | Descriptive title identifying the study design, population, interventions, and, if applicable, trial acronym | 1           |
| Trial registration                          | <a href="#">#2a</a> | Trial identifier and registry name. If not yet registered, name of intended registry                         | 2           |
| Trial registration: data set                | <a href="#">#2b</a> | All items from the World Health Organization Trial Registration Data Set                                     | n/a         |
| Protocol version                            | <a href="#">#3</a>  | Date and version identifier                                                                                  | 1           |
| Funding                                     | <a href="#">#4</a>  | Sources and types of financial, material, and other support                                                  | 14          |
| Roles and responsibilities: contributorship | <a href="#">#5a</a> | Names, affiliations, and roles of protocol contributors                                                      | 1, 14       |

|    |                           |                     |                                                          |     |
|----|---------------------------|---------------------|----------------------------------------------------------|-----|
| 1  | Roles and                 | <a href="#">#5b</a> | Name and contact information for the trial sponsor       | 1   |
| 2  | responsibilities:         |                     |                                                          |     |
| 3  | sponsor contact           |                     |                                                          |     |
| 4  | information               |                     |                                                          |     |
| 5  |                           |                     |                                                          |     |
| 6  |                           |                     |                                                          |     |
| 7  |                           |                     |                                                          |     |
| 8  | Roles and                 | <a href="#">#5c</a> | Role of study sponsor and funders, if any, in study      | 14  |
| 9  | responsibilities:         |                     | design; collection, management, analysis, and            |     |
| 10 | sponsor and funder        |                     | interpretation of data; writing of the report; and the   |     |
| 11 |                           |                     | decision to submit the report for publication, including |     |
| 12 |                           |                     | whether they will have ultimate authority over any of    |     |
| 13 |                           |                     | these activities                                         |     |
| 14 |                           |                     |                                                          |     |
| 15 |                           |                     |                                                          |     |
| 16 |                           |                     |                                                          |     |
| 17 | Roles and                 | <a href="#">#5d</a> | Composition, roles, and responsibilities of the          | 10  |
| 18 | responsibilities:         |                     | coordinating centre, steering committee, endpoint        |     |
| 19 | committees                |                     | adjudication committee, data management team, and        |     |
| 20 |                           |                     | other individuals or groups overseeing the trial, if     |     |
| 21 |                           |                     | applicable (see Item 21a for data monitoring committee)  |     |
| 22 |                           |                     |                                                          |     |
| 23 |                           |                     |                                                          |     |
| 24 |                           |                     |                                                          |     |
| 25 |                           |                     |                                                          |     |
| 26 | <b>Introduction</b>       |                     |                                                          |     |
| 27 |                           |                     |                                                          |     |
| 28 | Background and            | <a href="#">#6a</a> | Description of research question and justification for   | 3,4 |
| 29 | rationale                 |                     | undertaking the trial, including summary of relevant     |     |
| 30 |                           |                     | studies (published and unpublished) examining benefits   |     |
| 31 |                           |                     | and harms for each intervention                          |     |
| 32 |                           |                     |                                                          |     |
| 33 |                           |                     |                                                          |     |
| 34 |                           |                     |                                                          |     |
| 35 | Background and            | <a href="#">#6b</a> | Explanation for choice of comparators                    | 11  |
| 36 | rationale: choice of      |                     |                                                          |     |
| 37 | comparators               |                     |                                                          |     |
| 38 |                           |                     |                                                          |     |
| 39 |                           |                     |                                                          |     |
| 40 | Objectives                | <a href="#">#7</a>  | Specific objectives or hypotheses                        | 11  |
| 41 |                           |                     |                                                          |     |
| 42 |                           |                     |                                                          |     |
| 43 | Trial design              | <a href="#">#8</a>  | Description of trial design including type of trial (eg, | 4   |
| 44 |                           |                     | parallel group, crossover, factorial, single group),     |     |
| 45 |                           |                     | allocation ratio, and framework (eg, superiority,        |     |
| 46 |                           |                     | equivalence, non-inferiority, exploratory)               |     |
| 47 |                           |                     |                                                          |     |
| 48 |                           |                     |                                                          |     |
| 49 | <b>Methods:</b>           |                     |                                                          |     |
| 50 | <b>Participants,</b>      |                     |                                                          |     |
| 51 | <b>interventions, and</b> |                     |                                                          |     |
| 52 | <b>outcomes</b>           |                     |                                                          |     |
| 53 |                           |                     |                                                          |     |
| 54 |                           |                     |                                                          |     |
| 55 |                           |                     |                                                          |     |
| 56 | Study setting             | <a href="#">#9</a>  | Description of study settings (eg, community clinic,     | 4   |
| 57 |                           |                     | academic hospital) and list of countries where data will |     |
| 58 |                           |                     |                                                          |     |
| 59 |                           |                     |                                                          |     |
| 60 |                           |                     |                                                          |     |

be collected. Reference to where list of study sites can be obtained

|    |                                 |                      |                                                                                                                                                                                                                                                                                                                                                                                |
|----|---------------------------------|----------------------|--------------------------------------------------------------------------------------------------------------------------------------------------------------------------------------------------------------------------------------------------------------------------------------------------------------------------------------------------------------------------------|
| 1  |                                 |                      |                                                                                                                                                                                                                                                                                                                                                                                |
| 2  |                                 |                      |                                                                                                                                                                                                                                                                                                                                                                                |
| 3  |                                 |                      |                                                                                                                                                                                                                                                                                                                                                                                |
| 4  | Eligibility criteria            | <a href="#">#10</a>  | Inclusion and exclusion criteria for participants. If applicable, eligibility criteria for study centres and individuals who will perform the interventions (eg, surgeons, psychotherapists)                                                                                                                                                                                   |
| 5  |                                 |                      | 5                                                                                                                                                                                                                                                                                                                                                                              |
| 6  |                                 |                      |                                                                                                                                                                                                                                                                                                                                                                                |
| 7  |                                 |                      |                                                                                                                                                                                                                                                                                                                                                                                |
| 8  |                                 |                      |                                                                                                                                                                                                                                                                                                                                                                                |
| 9  |                                 |                      |                                                                                                                                                                                                                                                                                                                                                                                |
| 10 |                                 |                      |                                                                                                                                                                                                                                                                                                                                                                                |
| 11 | Interventions: description      | <a href="#">#11a</a> | Interventions for each group with sufficient detail to allow replication, including how and when they will be administered                                                                                                                                                                                                                                                     |
| 12 |                                 |                      | 6,7                                                                                                                                                                                                                                                                                                                                                                            |
| 13 |                                 |                      |                                                                                                                                                                                                                                                                                                                                                                                |
| 14 |                                 |                      |                                                                                                                                                                                                                                                                                                                                                                                |
| 15 |                                 |                      |                                                                                                                                                                                                                                                                                                                                                                                |
| 16 | Interventions: modifications    | <a href="#">#11b</a> | Criteria for discontinuing or modifying allocated interventions for a given trial participant (eg, drug dose change in response to harms, participant request, or improving / worsening disease)                                                                                                                                                                               |
| 17 |                                 |                      | 7, 10                                                                                                                                                                                                                                                                                                                                                                          |
| 18 |                                 |                      |                                                                                                                                                                                                                                                                                                                                                                                |
| 19 |                                 |                      |                                                                                                                                                                                                                                                                                                                                                                                |
| 20 |                                 |                      |                                                                                                                                                                                                                                                                                                                                                                                |
| 21 |                                 |                      |                                                                                                                                                                                                                                                                                                                                                                                |
| 22 |                                 |                      |                                                                                                                                                                                                                                                                                                                                                                                |
| 23 | Interventions: adherence        | <a href="#">#11c</a> | Strategies to improve adherence to intervention protocols, and any procedures for monitoring adherence (eg, drug tablet return; laboratory tests)                                                                                                                                                                                                                              |
| 24 |                                 |                      | 7, 10                                                                                                                                                                                                                                                                                                                                                                          |
| 25 |                                 |                      |                                                                                                                                                                                                                                                                                                                                                                                |
| 26 |                                 |                      |                                                                                                                                                                                                                                                                                                                                                                                |
| 27 |                                 |                      |                                                                                                                                                                                                                                                                                                                                                                                |
| 28 | Interventions: concomitant care | <a href="#">#11d</a> | Relevant concomitant care and interventions that are permitted or prohibited during the trial                                                                                                                                                                                                                                                                                  |
| 29 |                                 |                      | 5                                                                                                                                                                                                                                                                                                                                                                              |
| 30 |                                 |                      |                                                                                                                                                                                                                                                                                                                                                                                |
| 31 |                                 |                      |                                                                                                                                                                                                                                                                                                                                                                                |
| 32 | Outcomes                        | <a href="#">#12</a>  | Primary, secondary, and other outcomes, including the specific measurement variable (eg, systolic blood pressure), analysis metric (eg, change from baseline, final value, time to event), method of aggregation (eg, median, proportion), and time point for each outcome. Explanation of the clinical relevance of chosen efficacy and harm outcomes is strongly recommended |
| 33 |                                 |                      | 11                                                                                                                                                                                                                                                                                                                                                                             |
| 34 |                                 |                      |                                                                                                                                                                                                                                                                                                                                                                                |
| 35 |                                 |                      |                                                                                                                                                                                                                                                                                                                                                                                |
| 36 |                                 |                      |                                                                                                                                                                                                                                                                                                                                                                                |
| 37 |                                 |                      |                                                                                                                                                                                                                                                                                                                                                                                |
| 38 |                                 |                      |                                                                                                                                                                                                                                                                                                                                                                                |
| 39 |                                 |                      |                                                                                                                                                                                                                                                                                                                                                                                |
| 40 |                                 |                      |                                                                                                                                                                                                                                                                                                                                                                                |
| 41 |                                 |                      |                                                                                                                                                                                                                                                                                                                                                                                |
| 42 |                                 |                      |                                                                                                                                                                                                                                                                                                                                                                                |
| 43 | Participant timeline            | <a href="#">#13</a>  | Time schedule of enrolment, interventions (including any run-ins and washouts), assessments, and visits for participants. A schematic diagram is highly recommended (see Figure)                                                                                                                                                                                               |
| 44 |                                 |                      | 8                                                                                                                                                                                                                                                                                                                                                                              |
| 45 |                                 |                      |                                                                                                                                                                                                                                                                                                                                                                                |
| 46 |                                 |                      |                                                                                                                                                                                                                                                                                                                                                                                |
| 47 |                                 |                      |                                                                                                                                                                                                                                                                                                                                                                                |
| 48 |                                 |                      |                                                                                                                                                                                                                                                                                                                                                                                |
| 49 |                                 |                      |                                                                                                                                                                                                                                                                                                                                                                                |
| 50 | Sample size                     | <a href="#">#14</a>  | Estimated number of participants needed to achieve study objectives and how it was determined, including clinical and statistical assumptions supporting any sample size calculations                                                                                                                                                                                          |
| 51 |                                 |                      | 11                                                                                                                                                                                                                                                                                                                                                                             |
| 52 |                                 |                      |                                                                                                                                                                                                                                                                                                                                                                                |
| 53 |                                 |                      |                                                                                                                                                                                                                                                                                                                                                                                |
| 54 |                                 |                      |                                                                                                                                                                                                                                                                                                                                                                                |
| 55 |                                 |                      |                                                                                                                                                                                                                                                                                                                                                                                |
| 56 |                                 |                      |                                                                                                                                                                                                                                                                                                                                                                                |
| 57 | Recruitment                     | <a href="#">#15</a>  | Strategies for achieving adequate participant enrolment to reach target sample size                                                                                                                                                                                                                                                                                            |
| 58 |                                 |                      | 4,6                                                                                                                                                                                                                                                                                                                                                                            |
| 59 |                                 |                      |                                                                                                                                                                                                                                                                                                                                                                                |
| 60 |                                 |                      |                                                                                                                                                                                                                                                                                                                                                                                |

1 **Methods:**

2 **Assignment of**  
3 **interventions (for**  
4 **controlled trials)**  
5  
6

|    |                      |                      |                                                           |
|----|----------------------|----------------------|-----------------------------------------------------------|
| 7  |                      |                      |                                                           |
| 8  | Allocation: sequence | <a href="#">#16a</a> | Method of generating the allocation sequence (eg,         |
| 9  | generation           |                      | computer-generated random numbers), and list of any       |
| 10 |                      |                      | factors for stratification. To reduce predictability of a |
| 11 |                      |                      | random sequence, details of any planned restriction (eg,  |
| 12 |                      |                      | blocking) should be provided in a separate document       |
| 13 |                      |                      | that is unavailable to those who enrol participants or    |
| 14 |                      |                      | assign interventions                                      |
| 15 |                      |                      |                                                           |
| 16 |                      |                      |                                                           |
| 17 |                      |                      |                                                           |
| 18 |                      |                      |                                                           |
| 19 | Allocation           | <a href="#">#16b</a> | Mechanism of implementing the allocation sequence (eg,    |
| 20 | concealment          |                      | central telephone; sequentially numbered, opaque,         |
| 21 | mechanism            |                      | sealed envelopes), describing any steps to conceal the    |
| 22 |                      |                      | sequence until interventions are assigned                 |
| 23 |                      |                      |                                                           |
| 24 |                      |                      |                                                           |
| 25 |                      |                      |                                                           |
| 26 | Allocation:          | <a href="#">#16c</a> | Who will generate the allocation sequence, who will       |
| 27 | implementation       |                      | enrol participants, and who will assign participants to   |
| 28 |                      |                      | interventions                                             |
| 29 |                      |                      |                                                           |
| 30 |                      |                      |                                                           |
| 31 | Blinding (masking)   | <a href="#">#17a</a> | Who will be blinded after assignment to interventions     |
| 32 |                      |                      | (eg, trial participants, care providers, outcome          |
| 33 |                      |                      | assessors, data analysts), and how                        |
| 34 |                      |                      |                                                           |
| 35 |                      |                      |                                                           |
| 36 | Blinding (masking):  | <a href="#">#17b</a> | If blinded, circumstances under which unblinding is       |
| 37 | emergency unblinding |                      | permissible, and procedure for revealing a participant's  |
| 38 |                      |                      | allocated intervention during the trial                   |
| 39 |                      |                      |                                                           |
| 40 |                      |                      |                                                           |

41 **Methods: Data**  
42 **collection,**  
43 **management, and**  
44 **analysis**  
45  
46  
47

|    |                      |                      |                                                             |
|----|----------------------|----------------------|-------------------------------------------------------------|
| 48 | Data collection plan | <a href="#">#18a</a> | Plans for assessment and collection of outcome,             |
| 49 |                      |                      | baseline, and other trial data, including any related       |
| 50 |                      |                      | processes to promote data quality (eg, duplicate            |
| 51 |                      |                      | measurements, training of assessors) and a description      |
| 52 |                      |                      | of study instruments (eg, questionnaires, laboratory        |
| 53 |                      |                      | tests) along with their reliability and validity, if known. |
| 54 |                      |                      |                                                             |
| 55 |                      |                      |                                                             |
| 56 |                      |                      |                                                             |
| 57 |                      |                      |                                                             |
| 58 |                      |                      |                                                             |
| 59 |                      |                      |                                                             |
| 60 |                      |                      |                                                             |



Reference to where data collection forms can be found, if not in the protocol

|    |                            |                      |                                                             |
|----|----------------------------|----------------------|-------------------------------------------------------------|
| 1  |                            |                      |                                                             |
| 2  |                            |                      |                                                             |
| 3  |                            |                      |                                                             |
| 4  | Data collection plan:      | <a href="#">#18b</a> | Plans to promote participant retention and complete         |
| 5  | retention                  |                      | follow-up, including list of any outcome data to be         |
| 6  |                            |                      | collected for participants who discontinue or deviate from  |
| 7  |                            |                      | intervention protocols                                      |
| 8  |                            |                      |                                                             |
| 9  |                            |                      |                                                             |
| 10 | Data management            | <a href="#">#19</a>  | Plans for data entry, coding, security, and storage,        |
| 11 |                            |                      | including any related processes to promote data quality     |
| 12 |                            |                      | (eg, double data entry; range checks for data values).      |
| 13 |                            |                      | Reference to where details of data management               |
| 14 |                            |                      | procedures can be found, if not in the protocol             |
| 15 |                            |                      |                                                             |
| 16 |                            |                      |                                                             |
| 17 |                            |                      |                                                             |
| 18 |                            |                      |                                                             |
| 19 | Statistics: outcomes       | <a href="#">#20a</a> | Statistical methods for analysing primary and secondary     |
| 20 |                            |                      | outcomes. Reference to where other details of the           |
| 21 |                            |                      | statistical analysis plan can be found, if not in the       |
| 22 |                            |                      | protocol                                                    |
| 23 |                            |                      |                                                             |
| 24 |                            |                      |                                                             |
| 25 |                            |                      |                                                             |
| 26 | Statistics: additional     | <a href="#">#20b</a> | Methods for any additional analyses (eg, subgroup and       |
| 27 | analyses                   |                      | adjusted analyses)                                          |
| 28 |                            |                      |                                                             |
| 29 |                            |                      |                                                             |
| 30 | Statistics: analysis       | <a href="#">#20c</a> | Definition of analysis population relating to protocol non- |
| 31 | population and             |                      | adherence (eg, as randomised analysis), and any             |
| 32 | missing data               |                      | statistical methods to handle missing data (eg, multiple    |
| 33 |                            |                      | imputation)                                                 |
| 34 |                            |                      |                                                             |
| 35 |                            |                      |                                                             |
| 36 | <b>Methods: Monitoring</b> |                      |                                                             |
| 37 |                            |                      |                                                             |
| 38 |                            |                      |                                                             |
| 39 | Data monitoring:           | <a href="#">#21a</a> | Composition of data monitoring committee (DMC);             |
| 40 | formal committee           |                      | summary of its role and reporting structure; statement of   |
| 41 |                            |                      | whether it is independent from the sponsor and              |
| 42 |                            |                      | competing interests; and reference to where further         |
| 43 |                            |                      | details about its charter can be found, if not in the       |
| 44 |                            |                      | protocol. Alternatively, an explanation of why a DMC is     |
| 45 |                            |                      | not needed                                                  |
| 46 |                            |                      |                                                             |
| 47 |                            |                      |                                                             |
| 48 |                            |                      |                                                             |
| 49 |                            |                      |                                                             |
| 50 | Data monitoring:           | <a href="#">#21b</a> | Description of any interim analyses and stopping            |
| 51 | interim analysis           |                      | guidelines, including who will have access to these         |
| 52 |                            |                      | interim results and make the final decision to terminate    |
| 53 |                            |                      | the trial                                                   |
| 54 |                            |                      |                                                             |
| 55 |                            |                      |                                                             |
| 56 |                            |                      |                                                             |
| 57 | Harms                      | <a href="#">#22</a>  | Plans for collecting, assessing, reporting, and managing    |
| 58 |                            |                      | solicited and spontaneously reported adverse events         |
| 59 |                            |                      |                                                             |
| 60 |                            |                      |                                                             |

and other unintended effects of trial interventions or trial conduct

|    |                                      |                      |                                                                                                                                                                                                                                    |
|----|--------------------------------------|----------------------|------------------------------------------------------------------------------------------------------------------------------------------------------------------------------------------------------------------------------------|
| 1  |                                      |                      |                                                                                                                                                                                                                                    |
| 2  |                                      |                      |                                                                                                                                                                                                                                    |
| 3  |                                      |                      |                                                                                                                                                                                                                                    |
| 4  | Auditing                             | <a href="#">#23</a>  | Frequency and procedures for auditing trial conduct, if any, and whether the process will be independent from investigators and the sponsor                                                                                        |
| 5  |                                      |                      | n/a                                                                                                                                                                                                                                |
| 6  |                                      |                      |                                                                                                                                                                                                                                    |
| 7  |                                      |                      |                                                                                                                                                                                                                                    |
| 8  |                                      |                      |                                                                                                                                                                                                                                    |
| 9  | <b>Ethics and</b>                    |                      |                                                                                                                                                                                                                                    |
| 10 | <b>dissemination</b>                 |                      |                                                                                                                                                                                                                                    |
| 11 |                                      |                      |                                                                                                                                                                                                                                    |
| 12 |                                      |                      |                                                                                                                                                                                                                                    |
| 13 | Research ethics approval             | <a href="#">#24</a>  | Plans for seeking research ethics committee / institutional review board (REC / IRB) approval                                                                                                                                      |
| 14 |                                      |                      | 13                                                                                                                                                                                                                                 |
| 15 |                                      |                      |                                                                                                                                                                                                                                    |
| 16 |                                      |                      |                                                                                                                                                                                                                                    |
| 17 | Protocol amendments                  | <a href="#">#25</a>  | Plans for communicating important protocol modifications (eg, changes to eligibility criteria, outcomes, analyses) to relevant parties (eg, investigators, REC / IRBs, trial participants, trial registries, journals, regulators) |
| 18 |                                      |                      | 13                                                                                                                                                                                                                                 |
| 19 |                                      |                      |                                                                                                                                                                                                                                    |
| 20 |                                      |                      |                                                                                                                                                                                                                                    |
| 21 |                                      |                      |                                                                                                                                                                                                                                    |
| 22 |                                      |                      |                                                                                                                                                                                                                                    |
| 23 |                                      |                      |                                                                                                                                                                                                                                    |
| 24 |                                      |                      |                                                                                                                                                                                                                                    |
| 25 | Consent or assent                    | <a href="#">#26a</a> | Who will obtain informed consent or assent from potential trial participants or authorised surrogates, and how (see Item 32)                                                                                                       |
| 26 |                                      |                      | 4,6                                                                                                                                                                                                                                |
| 27 |                                      |                      |                                                                                                                                                                                                                                    |
| 28 |                                      |                      |                                                                                                                                                                                                                                    |
| 29 |                                      |                      |                                                                                                                                                                                                                                    |
| 30 | Consent or assent: ancillary studies | <a href="#">#26b</a> | Additional consent provisions for collection and use of participant data and biological specimens in ancillary studies, if applicable                                                                                              |
| 31 |                                      |                      | 13                                                                                                                                                                                                                                 |
| 32 |                                      |                      |                                                                                                                                                                                                                                    |
| 33 |                                      |                      |                                                                                                                                                                                                                                    |
| 34 |                                      |                      |                                                                                                                                                                                                                                    |
| 35 |                                      |                      |                                                                                                                                                                                                                                    |
| 36 | Confidentiality                      | <a href="#">#27</a>  | How personal information about potential and enrolled participants will be collected, shared, and maintained in order to protect confidentiality before, during, and after the trial                                               |
| 37 |                                      |                      | 13                                                                                                                                                                                                                                 |
| 38 |                                      |                      |                                                                                                                                                                                                                                    |
| 39 |                                      |                      |                                                                                                                                                                                                                                    |
| 40 |                                      |                      |                                                                                                                                                                                                                                    |
| 41 |                                      |                      |                                                                                                                                                                                                                                    |
| 42 |                                      |                      |                                                                                                                                                                                                                                    |
| 43 | Declaration of interests             | <a href="#">#28</a>  | Financial and other competing interests for principal investigators for the overall trial and each study site                                                                                                                      |
| 44 |                                      |                      | 14                                                                                                                                                                                                                                 |
| 45 |                                      |                      |                                                                                                                                                                                                                                    |
| 46 |                                      |                      |                                                                                                                                                                                                                                    |
| 47 | Data access                          | <a href="#">#29</a>  | Statement of who will have access to the final trial dataset, and disclosure of contractual agreements that limit such access for investigators                                                                                    |
| 48 |                                      |                      | 13                                                                                                                                                                                                                                 |
| 49 |                                      |                      |                                                                                                                                                                                                                                    |
| 50 |                                      |                      |                                                                                                                                                                                                                                    |
| 51 |                                      |                      |                                                                                                                                                                                                                                    |
| 52 | Ancillary and post trial care        | <a href="#">#30</a>  | Provisions, if any, for ancillary and post-trial care, and for compensation to those who suffer harm from trial participation                                                                                                      |
| 53 |                                      |                      | 10                                                                                                                                                                                                                                 |
| 54 |                                      |                      |                                                                                                                                                                                                                                    |
| 55 |                                      |                      |                                                                                                                                                                                                                                    |
| 56 |                                      |                      |                                                                                                                                                                                                                                    |
| 57 | Dissemination policy: trial results  | <a href="#">#31a</a> | Plans for investigators and sponsor to communicate trial results to participants, healthcare professionals, the                                                                                                                    |
| 58 |                                      |                      | 13                                                                                                                                                                                                                                 |
| 59 |                                      |                      |                                                                                                                                                                                                                                    |
| 60 |                                      |                      |                                                                                                                                                                                                                                    |

public, and other relevant groups (eg, via publication, reporting in results databases, or other data sharing arrangements), including any publication restrictions

|    |                       |                      |                                                           |
|----|-----------------------|----------------------|-----------------------------------------------------------|
| 1  |                       |                      |                                                           |
| 2  |                       |                      |                                                           |
| 3  |                       |                      |                                                           |
| 4  |                       |                      |                                                           |
| 5  | Dissemination policy: | <a href="#">#31b</a> | Authorship eligibility guidelines and any intended use of |
| 6  | authorship            |                      | professional writers                                      |
| 7  |                       |                      |                                                           |
| 8  |                       |                      |                                                           |
| 9  | Dissemination policy: | <a href="#">#31c</a> | Plans, if any, for granting public access to the full     |
| 10 | reproducible research |                      | protocol, participant-level dataset, and statistical code |
| 11 |                       |                      |                                                           |
| 12 |                       |                      |                                                           |

## 13 Appendices

|    |                      |                     |                                                               |
|----|----------------------|---------------------|---------------------------------------------------------------|
| 14 |                      |                     |                                                               |
| 15 | Informed consent     | <a href="#">#32</a> | Model consent form and other related documentation            |
| 16 | materials            |                     | given to participants and authorised surrogates               |
| 17 |                      |                     |                                                               |
| 18 |                      |                     |                                                               |
| 19 | Biological specimens | <a href="#">#33</a> | Plans for collection, laboratory evaluation, and storage of   |
| 20 |                      |                     | biological specimens for genetic or molecular analysis in     |
| 21 |                      |                     | the current trial and for future use in ancillary studies, if |
| 22 |                      |                     | applicable                                                    |
| 23 |                      |                     |                                                               |
| 24 |                      |                     |                                                               |
| 25 |                      |                     |                                                               |

26 The SPIRIT Explanation and Elaboration paper is distributed under the terms of the Creative  
 27 Commons Attribution License CC-BY-NC. This checklist was completed on 24. November 2022 using  
 28 <https://www.goodreports.org/>, a tool made by the [EQUATOR Network](#) in collaboration with  
 29 [Penelope.ai](#)  
 30  
 31  
 32  
 33  
 34  
 35  
 36  
 37  
 38  
 39  
 40  
 41  
 42  
 43  
 44  
 45  
 46  
 47  
 48  
 49  
 50  
 51  
 52  
 53  
 54  
 55  
 56  
 57  
 58  
 59  
 60

# BMJ Open

## Protocol for Gut Bugs in Anorexia Nervosa: An open-label pilot trial of faecal microbiome transfer to restore the gut microbiome in anorexia nervosa

|                                 |                                                                                                                                                                                                                                                                                                                                                                                                                                                                                                                                                                                                                                                                                                                                                                                                                                                                                                                                                                                                                                                                                                                                        |
|---------------------------------|----------------------------------------------------------------------------------------------------------------------------------------------------------------------------------------------------------------------------------------------------------------------------------------------------------------------------------------------------------------------------------------------------------------------------------------------------------------------------------------------------------------------------------------------------------------------------------------------------------------------------------------------------------------------------------------------------------------------------------------------------------------------------------------------------------------------------------------------------------------------------------------------------------------------------------------------------------------------------------------------------------------------------------------------------------------------------------------------------------------------------------------|
| Journal:                        | <i>BMJ Open</i>                                                                                                                                                                                                                                                                                                                                                                                                                                                                                                                                                                                                                                                                                                                                                                                                                                                                                                                                                                                                                                                                                                                        |
| Manuscript ID                   | bmjopen-2022-070616.R1                                                                                                                                                                                                                                                                                                                                                                                                                                                                                                                                                                                                                                                                                                                                                                                                                                                                                                                                                                                                                                                                                                                 |
| Article Type:                   | Protocol                                                                                                                                                                                                                                                                                                                                                                                                                                                                                                                                                                                                                                                                                                                                                                                                                                                                                                                                                                                                                                                                                                                               |
| Date Submitted by the Author:   | 10-May-2023                                                                                                                                                                                                                                                                                                                                                                                                                                                                                                                                                                                                                                                                                                                                                                                                                                                                                                                                                                                                                                                                                                                            |
| Complete List of Authors:       | Wilson, Brooke; The University of Auckland, Liggins Institute<br>Derraik, José; The University of Auckland, Liggins Institute; The University of Auckland, Department of Paediatrics: Child and Youth Health, Faculty of Medical and Health Sciences<br>Albert, Benjamin; The University of Auckland, Liggins Institute<br>Leong, Karen; The University of Auckland, Liggins Institute<br>Tweedie-Cullen, Ry; The University of Auckland, Liggins Institute<br>Creagh, Christine; The University of Auckland, Liggins Institute<br>Depczynski, Marysia; The University of Auckland, Liggins Institute<br>Edwards, Taygen; The University of Auckland, Liggins Institute<br>Vatanen, Tommi; The University of Auckland, Liggins Institute; University of Helsinki, Research Program for Clinical and Molecular Metabolism<br>Thabrew, Hiran; The University of Auckland, Psychological Medicine; The University of Auckland, Te Ara Hāro, Centre for Infant, Child and Adolescent Mental Health<br>Cutfield, Wayne; The University of Auckland, Liggins Institute<br>O'Sullivan, Justin ; The University of Auckland, Liggins Institute |
| <b>Primary Subject Heading</b>: | Gastroenterology and hepatology                                                                                                                                                                                                                                                                                                                                                                                                                                                                                                                                                                                                                                                                                                                                                                                                                                                                                                                                                                                                                                                                                                        |
| Secondary Subject Heading:      | Gastroenterology and hepatology, Mental health, Pharmacology and therapeutics                                                                                                                                                                                                                                                                                                                                                                                                                                                                                                                                                                                                                                                                                                                                                                                                                                                                                                                                                                                                                                                          |
| Keywords:                       | Eating disorders < PSYCHIATRY, MICROBIOLOGY, THERAPEUTICS, Transplant medicine < INTERNAL MEDICINE, GASTROENTEROLOGY                                                                                                                                                                                                                                                                                                                                                                                                                                                                                                                                                                                                                                                                                                                                                                                                                                                                                                                                                                                                                   |
|                                 |                                                                                                                                                                                                                                                                                                                                                                                                                                                                                                                                                                                                                                                                                                                                                                                                                                                                                                                                                                                                                                                                                                                                        |

SCHOLARONE™  
Manuscripts

1  
2  
3 1 **Protocol for Gut Bugs in Anorexia Nervosa:**  
4  
5 2 **An open-label pilot trial of faecal microbiome transfer to restore the gut**  
6 3 **microbiome in anorexia nervosa**  
7  
8 4

9 5 Brooke C. Wilson<sup>a</sup>, José G. B. Derraik<sup>a,b</sup>, Benjamin B. Albert<sup>a</sup>, Karen S. W. Leong<sup>a</sup>, Ry Y. Tweedie-  
10 6 Cullen<sup>a</sup>, Christine Creagh<sup>a</sup>, Marysia Depczynski<sup>a</sup>, Taygen Edwards<sup>a</sup>, Tommi Vatanen<sup>a,c</sup>, Hiran Thabrew<sup>d,e</sup>,  
11 7 Wayne S. Cutfield<sup>a</sup>, Justin M. O'Sullivan<sup>a\*</sup>  
12  
13  
14 8

15 9 a. Liggins Institute, University of Auckland, Auckland, New Zealand.

16 10 b. Department of Paediatrics: Child and Youth Health, Faculty of Medical and Health Sciences, University of  
17 11 Auckland, Auckland, New Zealand.

18 12 c. Research Program for Clinical and Molecular Metabolism, University of Helsinki, Finland

19 13 d. Department of Psychological Medicine, University of Auckland, Auckland, New Zealand.

20 14 e. Te Ara Hāro, Centre for Infant, Child and Adolescent Mental Health, University of Auckland, Auckland New  
21 15 Zealand.  
22 16

23 17 **\*Correspondence**

24 18 Professor Justin O'Sullivan

25 19 Address: Liggins Institute, University of Auckland, Private Bag 92019, Auckland, New Zealand

26 20 Email: [justin.osullivan@auckland.ac.nz](mailto:justin.osullivan@auckland.ac.nz)  
27 21

28 22 **Version**

29 23 2  
30 24

31 25 **Word count** (excludes abstract, tables, acknowledgements, author contributions, COI, references)

32 26 4088  
33  
34  
35  
36  
37  
38  
39  
40  
41  
42  
43  
44  
45  
46  
47  
48  
49  
50  
51  
52  
53  
54  
55  
56  
57  
58  
59  
60

## 27 ABSTRACT

28

29 **Introduction:** Individuals with anorexia nervosa (AN) harbour distinct gut microbiomes compared to healthy  
30 individuals, which are sufficient to induce weight loss and anxiety-like behaviours when transplanted into  
31 germ-free mice. We hypothesise that faecal microbiome transfer (FMT) from healthy donors would help  
32 restore the gut microbiome of individuals with AN, which in turn, may aid patient recovery.

33

34 **Methods:** We aim to conduct an open-label pilot study in 20 females aged 16-32 years who meet the DSM-5  
35 criteria for AN and have a BMI 13-19 kg/m<sup>2</sup>. We will recruit four healthy, lean, female donors, aged 18-32  
36 years, who will undergo extensive clinical screening prior to stool donation. Faecal microbiota will be  
37 harvested from donors and double encapsulated in delayed release, acid-resistant capsules. All participants  
38 will receive a single course of 20 FMT capsules (five from each donor) which they can choose to take over  
39 two or four consecutive days. Stool and blood samples will be collected from participants over a period of  
40 three months to assess their gut microbiome profile, metabolome, intestinal inflammation, and nutritional  
41 status. Our primary outcome is a shift in the gut microbiome composition at 3 weeks post-FMT (Bray-Curtis  
42 dissimilarity). We will also monitor participants' body composition (DXA scans), eating disorder  
43 psychopathology, mental health, and assess their views on, and tolerability of, treatment. All adverse events  
44 will be recorded and reviewed by an independent data monitoring committee.

45

46 **Ethics and dissemination:** Ethics approval was provided by the Central Health and Disability Ethics  
47 Committee (Ministry of Health, New Zealand, 21/CEN/212). Results will be published in peer-reviewed  
48 journals and presented to both scientific and consumer group audiences.

49

50 **Trial registration:** Australian New Zealand Clinical Trials Registry (ACTRN12621001504808).

51

52

### 53 STRENGTHS AND LIMITATIONS OF THIS STUDY

- This pilot trial investigates FMT as a therapy for gut microbiome restoration in young women with AN.
- This study has been co-designed in consultation with eating disorder specialists and recovered individuals to minimise participant harm and stress.
- The use of high-resolution shotgun metagenomic sequencing will allow for a comprehensive gut microbiome assessment and longitudinal tracking of donor strain engraftment.
- While we will monitor clinical features of AN throughout the trial, efficacy of FMT on clinical outcomes cannot be assessed due to its design without a control group.
- By focusing on young women with AN, study findings may not necessarily apply to the broader population of individuals with AN.

56

57

58

59

60

## 54 INTRODUCTION

55 Anorexia nervosa (AN) is a complex and debilitating eating disorder characterised by extremely restrictive  
56 eating behaviour, very low body weight, a fear of weight gain, and body image distortion [1]. AN has the  
57 highest mortality rate among psychiatric disorders (standardised mortality ratio of 5.86 [2]) and is often  
58 accompanied by comorbidities including anxiety, depression, autoimmune disorders, and functional  
59 gastrointestinal disorders [2–5]. AN usually begins in adolescence and is more common in women (lifetime  
60 prevalence of 1.4% compared to 0.2% in men [6]). While its exact aetiology is unclear, the development of  
61 AN likely stems from both environmental triggers [7] and genetic predisposition [8, 9]. In addition, emerging  
62 evidence suggests the gut microbiome might also be involved in AN as an important regulator of appetite,  
63 mood, and metabolism [10–13].

64  
65 Multiple studies have shown that the gut microbiome is perturbed in individuals with AN [14–25]. Early  
66 reports suggested AN microbiomes were typically less diverse when compared against healthy age-  
67 matched controls [19, 21]. However, more recent observations do not support a simple reduction in microbial  
68 diversity being linked to AN [16, 17, 24], but rather, a difference in the relative abundances of specific taxa.  
69 In particular, a recent systematic review determined that AN individuals harboured proportionally less fiber-  
70 utilising taxa (e.g. *Roseburia* sp.) and more mucin-degrading taxa (e.g. *Akkermansia* sp. and  
71 *Methanobrevibacter smithii*) [26]. Degradation of the intestinal mucus lining can lead to increased  
72 permeability and translocation of bacterial products into circulation [27, 28], both of which have been  
73 observed in AN [29–32].

74  
75 While the gut microbiome alterations observed in AN are likely a consequence of severe caloric restriction  
76 and psychological stress, the gut microbiome itself has also been suggested to play a role in perpetuating  
77 symptoms of the disorder [33]. For example, individuals with AN have higher blood levels of caseinolytic-  
78 protease-B (ClpB), a protein produced by commensal gut species [32]. ClpB shares homology with the  
79 human anorexigenic  $\alpha$ -melanocyte-stimulating hormone ( $\alpha$ -MSH) and may therefore mimic its function to  
80 suppress appetite and increase energy expenditure [34].

81  
82 A contributory role of the gut microbiome in AN symptomatology was demonstrated when germ-free mice  
83 were inoculated with the gut microbiome derived from either healthy human donors or donors with AN [35].  
84 The offspring of mice who received the 'AN microbiome' showed reduced body weight and a concomitant  
85 reduction in food intake. Interestingly, when the 'AN microbiome' mice ate the same amount of food as the  
86 'healthy microbiome' mice, they gained less weight suggesting they were less efficient at converting food  
87 into body mass [35]. Furthermore, the 'AN microbiome' mice had reduced serotonin levels and displayed  
88 anxiety-related and compulsive behaviours [35]. Similar weight gain differences were observed in another  
89 germ-free mice experiment that utilised both AN and healthy control donors, with differences being linked  
90 to altered expression of appetite-suppression and thermogenesis genes [17]. By contrast, another study  
91 found no difference in body weight or daily food intake between mice receiving transplantations of AN- or  
92 healthy-donor microbiota [36]. Further research is therefore required to determine whether the gut  
93 microbiome acts as a potential mediator of disease in AN and is thus a suitable target for therapeutic  
94 intervention.

1  
2  
3 95  
4 96 Current treatment approaches for AN are multidisciplinary and focus on nutritional rehabilitation, weight  
5 97 restoration, and cognitive behavioural therapy [37]. However, despite these efforts, approximately 30% of  
6 98 individuals will only partially recover from the disorder, with a further 20% maintaining a chronic course of  
7 99 illness over their lifetime [38]. Even after nutritional interventions and weight restoration, the gut microbiome  
8 100 in individuals with AN remains distinct from that of healthy individuals [19, 20], potentially contributing to  
9 101 relapse of symptoms [33]. Therefore, strategies designed to restore the gut microbiome in AN may be of  
10 102 clinical benefit when used in conjunction with current nutritional rehabilitation therapies, and warrant further  
11 103 investigation.  
12 104

13 105 Faecal microbiome transfer (FMT) involves the transfer of gut microbiota from healthy donors to recipients  
14 106 with gut dysbiosis. This therapy has proven highly effective for treating recurrent *Clostridioides difficile*  
15 107 infections, and can rapidly restore the diversity and functions of the gut microbiome in these patients [39].  
16 108 FMT has also been trialled in other disorders associated with less severe forms of gut dysbiosis, such as  
17 109 obesity [40–42], metabolic syndrome [43–46], inflammatory bowel disease [47], irritable bowel syndrome  
18 110 [48], and autism [49]. While FMT cannot cure these multi-faceted conditions, its ability to alter the gut  
19 111 microbiome has led to various therapeutic benefits among recipients including improvements in fat  
20 112 distribution [42], metabolic syndrome [42], insulin sensitivity [43, 44], intestinal permeability [50], gut  
21 113 inflammation [51], gastrointestinal symptoms [52], and social behaviours [49].  
22 114

23 115 Given the role of the gut microbiome in regulating appetite, mood, and metabolism [10–12], restoring the  
24 116 gut microbiome in individuals with AN may act as a stepping stone towards improved patient recovery. There  
25 117 have been two published case reports of FMT in patients with AN [53, 54]. In both instances, the patients  
26 118 showed an increase in gut microbiome diversity following FMT, however, metabolic improvements and  
27 119 weight restoration were only observed in one case [53]. Further research is therefore necessary to better  
28 120 understand whether FMT represents a viable treatment option for individuals with AN.  
29 121

30 122 The aim of this pilot study is to assess the feasibility of using FMT to help restore the gut microbiome in  
31 123 individuals with AN. Rather than using invasive FMT administration approaches with limited scalability, our  
32 124 study will employ validated methods for donor microbiome encapsulation [55, 56]. To help boost microbiome  
33 125 diversity, participants will receive an equal number of capsules from four donors who will be selected after  
34 126 extensive health and microbiome screening. Participants will be monitored for adverse events, have their  
35 127 gut microbiome profiled, and be clinically assessed for up to three months post-FMT.  
36 128

## 37 129 **METHODS**

### 38 130 **Study design**

39 131 This study is a one-arm, open-label pilot trial investigating the safety, tolerability, and potential of FMT to  
40 132 restore the gut microbiome in young females with AN. The study will be conducted at the Liggins Institute's  
41 133 Clinical Research Unit (University of Auckland), in Auckland, New Zealand.  
42 134



1  
2  
3 135 **Participants**

4 136 We aim to recruit 20 female participants aged 16-32 years who meet the DSM-5 criteria for AN and have a  
5 137 body mass index (BMI) 13-19 kg/m<sup>2</sup> (Table 1). Participants will be recruited through engagement with local  
6 eating disorder clinics, the Eating Disorders Association New Zealand (EDANZ), and social media. Study  
7 138 brochures and a detailed participant information sheet will be supplied to potential participants and their  
8 139 caregivers who are interested and considered eligible by their specialist physician. Participants will have the  
9 140 opportunity to ask any questions about the study before they decide to consent. Participants will be able to  
10 141 withdraw from the study at any time.  
11  
12  
13  
14  
15  
16  
17  
18  
19  
20  
21  
22  
23  
24  
25  
26  
27  
28  
29  
30  
31  
32  
33  
34  
35  
36  
37  
38  
39  
40  
41  
42  
43  
44  
45  
46  
47  
48  
49  
50  
51  
52  
53  
54  
55  
56  
57  
58  
59  
60

For peer review only

**Table 1.** Eligibility criteria for participants and donors.

|                  | Participants                                                                                           | Donors                                                                                                                           |
|------------------|--------------------------------------------------------------------------------------------------------|----------------------------------------------------------------------------------------------------------------------------------|
| <b>Inclusion</b> |                                                                                                        |                                                                                                                                  |
|                  | Biological female at birth                                                                             | Biological female at birth                                                                                                       |
|                  | 16 - 32 years of age                                                                                   | 18 - 32 years of age                                                                                                             |
|                  | BMI 13 - 19 kg/m <sup>2</sup>                                                                          | BMI 18.5 - 25 kg/m <sup>2</sup>                                                                                                  |
|                  | Formal diagnosis of AN by an eating disorder specialist <sup>a</sup>                                   | Total body fat ≤33% (as assessed by DXA)                                                                                         |
|                  | Medically stable <sup>b</sup>                                                                          | Healthy diet (≥4 portions of fruit and/or vegetables/day)                                                                        |
|                  | Able and willing to swallow the treatment capsules                                                     | Regular exercise (moderate-to-vigorous physical activity for ≥3.5 hours/week)                                                    |
|                  | Able and willing to comply with the clinical assessments                                               | Regular bowel habit (passing stools at least once every two days)                                                                |
| <b>Exclusion</b> |                                                                                                        |                                                                                                                                  |
|                  | Known allergies to food and/or common medications                                                      | Positive screening test for any transmissible pathogen or multi-drug resistant organism listed in Table 2                        |
|                  | Use of antibiotics or probiotics in the month prior to treatment                                       | Gastrointestinal disease (e.g. inflammatory bowel disease, irritable bowel syndrome, coeliac disease, eosinophilic oesophagitis) |
|                  | Regular oral steroid treatment or daily application of potent topical steroids extensively to the body | Metabolic disorder (e.g. diabetes, metabolic syndrome, hypertension, dyslipidemia, dysglycaemia)                                 |
|                  | Compromised immune system                                                                              | Impaired fasting glucose (>5.9 mmol/l) or elevated HbA1c (>41 mmol/mol)                                                          |
|                  | Any chronic illness affecting gut or metabolic health                                                  | Asthma or eczema requiring regular prophylaxis or treatment                                                                      |
|                  | Thoughts of self-harm and/or suicide ideation <sup>c</sup>                                             | Autism spectrum conditions                                                                                                       |
|                  | Current or planned pregnancy during the course of the study                                            | Previous diagnosis of mental health issues including eating disorders                                                            |
|                  | Regular laxative use                                                                                   | Current or past history of malignancy                                                                                            |
|                  |                                                                                                        | Use of oral antibiotics or probiotic supplements in the past 3 months                                                            |
|                  |                                                                                                        | Regular binge drinking (>5 alcoholic standards/session at least once/week)                                                       |
|                  |                                                                                                        | Past or present use of recreational drugs, tobacco, or vaping                                                                    |
|                  |                                                                                                        | Current or past pregnancy                                                                                                        |
|                  |                                                                                                        | Overseas travel in the past two weeks <sup>d</sup>                                                                               |
|                  |                                                                                                        | UK residence in 1980-1996 for 6 months or longer <sup>e</sup>                                                                    |

<sup>a</sup> Meeting the DSM-5 criteria, 307.1

<sup>b</sup> In accordance with Starship Children's Hospital's clinical guidelines [57] (i.e., resting heart rate > 50 bpm; no postural drop in blood pressure or rise in heart rate, no electrolyte abnormalities, temperature >35°C and <37.8°C).

<sup>c</sup> Based on response to question 9 of the Patient Health Questionnaire-9 (PHQ9) [58] .

<sup>d</sup> Donors who have travelled overseas will need to wait a minimum period of 2 weeks from their arrival back in New Zealand before donating.

<sup>e</sup> Due to the risk of variant Creutzfeldt-Jakob disease.

## 143 Donors

144 To minimise treatment heterogeneity, we will attempt to use the same four FMT donors throughout the  
 145 trial. We aim to recruit up to eight female stool donors to ensure we have sufficient reserve donors if one  
 146 becomes unwell, unavailable, or otherwise ineligible during the study. Donors will be recruited through  
 147 the University of Auckland's internal email list and via social media advertising. Potential donors will be  
 148 interviewed over the phone to assess general eligibility criteria (i.e. health and lifestyle parameters) before  
 149 being invited to our clinic for further screening. We will employ the same donor screening protocol used  
 150 in our previous FMT trial [59] (Table 1). Donors will be screened to ensure the absence of disease and  
 151 any transmissible viral, bacterial, or protozoal pathogens (Table 2). Donors will be given a detailed  
 152 participant information sheet to read, and will have the opportunity to ask any questions about the study  
 153 before they decide to consent. Donors will be able to withdraw from the study at any time. Any capsules  
 154 produced prior to withdrawal may be kept for use in the study.

155 **Table 2.** Pathogen screening for donors.

|              | <b>Bacteria</b>                                                                                                                                                                                                                                                                                                                                                                                                                                                                                                                                                                                                                                                                            | <b>Parasites</b>                                                                                                                                                              | <b>Viruses</b>                                                                   |
|--------------|--------------------------------------------------------------------------------------------------------------------------------------------------------------------------------------------------------------------------------------------------------------------------------------------------------------------------------------------------------------------------------------------------------------------------------------------------------------------------------------------------------------------------------------------------------------------------------------------------------------------------------------------------------------------------------------------|-------------------------------------------------------------------------------------------------------------------------------------------------------------------------------|----------------------------------------------------------------------------------|
| <b>Blood</b> | <i>Treponema pallidum</i> (syphilis)                                                                                                                                                                                                                                                                                                                                                                                                                                                                                                                                                                                                                                                       | <i>Strongyloides</i> spp.*                                                                                                                                                    | Hepatitis A, B, C<br>HIV                                                         |
| <b>Stool</b> | <i>Campylobacter</i> spp.<br><i>Clostridioides difficile</i> toxin A/B<br>Diarrheagenic <i>Escherichia coli</i> / <i>Shigella</i> :<br>- Enteroaggregative <i>E. coli</i> (EAEC)<br>- Enteroinvasive <i>E. coli</i> (EIEC)<br>- Enteropathogenic <i>E. coli</i> (EPEC)<br>- Enterotoxigenic <i>E. coli</i> (ETEC)<br>- Shiga-like toxin-producing <i>E. coli</i> (STEC)<br><i>Helicobacter pylori</i><br>Multidrug-resistant organisms:<br>- Carbapenem-resistant organisms<br>- ESBL-producing Enterobacteriaceae<br>- Vancomycin-resistant <i>Enterococcus</i> spp.<br><i>Plesiomonas shigelloides</i><br><i>Salmonella</i> spp.<br><i>Vibrio</i> spp.<br><i>Yersinia enterocolitica</i> | <i>Cryptosporidium</i> spp.<br><i>Cyclospora cayetanensis</i><br><i>Entamoeba histolytica</i><br><i>Giardia lamblia</i><br>Microscopic examination<br>(ova, cysts, parasites) | Adenovirus F 40/41<br>Astrovirus<br>Norovirus GI/GII<br>Rotavirus A<br>Sapovirus |
| <b>Nasal</b> |                                                                                                                                                                                                                                                                                                                                                                                                                                                                                                                                                                                                                                                                                            |                                                                                                                                                                               | SARS-CoV-2                                                                       |

157 \* Only performed if the donor has a history of travel to the tropics.

## 159 Treatment

160 All participants will receive the same treatment. We will use a multi-donor FMT approach in which  
 161 recipients receive 20 capsules containing the gut microbiota from four healthy female donors (5 capsules  
 162 from each donor). Treatment will be spread over two days (10 capsules/day) or four days (5 capsules/day)  
 163 depending on the participant's preference. The total FMT dose corresponds to 10 g of concentrated gut  
 164 microbiota (2.5 g/donor).

1  
2  
3 165  
4  
5 166 *FMT capsule preparation*  
6 167 Donors will be asked to visit the Clinical Research Unit every six months to provide fresh stool samples  
7 168 for capsule production. Pathogen screening will be repeated for every capsule batch (Table 2). If multiple  
8  
9 169 stool samples from the same donor are required for one batch of capsules, repeat screening will only be  
10 170 performed if it has been >2 weeks since their last pathogen screen. If any of the four selected donors fail  
11 171 their repeat screening, we will contact and invite one of the reserve donors for rescreening.  
12

13 172  
14 173 We will use validated methods for gut microbiome encapsulation as described previously [59]. Donor  
15 174 stools will be processed individually for encapsulation under aerobic conditions. Immediately after  
16 175 donation, stool will be blended with 1:2 volumes of 0.9% saline solution and sieved to remove particulate  
17 176 matter. To remove any remaining particulate matter, the faecal slurry will be centrifuged (200x gravity, 5  
18 177 min, room temperature). The resulting supernatant will be decanted into a fresh tube and centrifuged  
19 178 (5000x gravity, 15 min, room temperature) to concentrate the bacterial pellet. The bacterial pellet will be  
20 179 resuspended at a concentration of 1 g/ml in a cryoprotective solution (15% glycerol, 0.9% saline) and 500  
21 180 µl aliquots will be dispensed into size 0 delayed release capsules (DRcaps™, Capsugel, Sydney,  
22 181 Australia). The size 0 capsules will be closed and secondarily sealed in size 00 DRcaps™ capsules.  
23 182 DRcaps™ are specifically designed to mask taste and odour, resist stomach acid, and deliver their  
24 183 contents to the proximal bowel [60]. Capsules will be stored at -80°C for up to 6 months.  
25  
26 184

#### 185 *FMT capsule administration*

186 Treatment appointments will be scheduled for early morning and the participant will need to have fasted  
187 overnight for at least 8 hours. Given the high rates of laxative abuse in individuals with AN [61], we will  
188 not be performing a laxative bowel cleanse prior to FMT. Depending on the participant's preference, the  
189 capsule dose can be spread over two or four consecutive mornings. Capsules will be swallowed with  
190 water under direct supervision from a research nurse or clinician. Participants will be asked to postpone  
191 their breakfast until one hour after swallowing the capsules to help minimise the length of time the  
192 capsules will spend in the stomach.  
193

#### 194 **Study schedule**

195 Participants will have an enrolment appointment where we will explain the study in detail, assess their  
196 eligibility, and obtain their written informed consent. During this visit, we will perform a whole-body dual-  
197 energy X-ray absorptiometry (DXA) scan and administer the Patient Health Questionnaire 9 (PHQ-9) to  
198 confirm they meet the BMI criteria and do not have feelings of self-harm/suicidal ideation. We will also  
199 collect a stool sample from the participant during this visit and schedule their baseline assessment for 3  
200 weeks time (Table 3). The first treatment dose will be given at baseline after all assessments have been  
201 completed. Subsequent treatment doses will be scheduled the following consecutive day/s depending on  
202 the participant's preference for a 2-day or 4-day treatment schedule. Follow-up clinical assessments will  
203 be scheduled for 6 and 12 weeks after baseline. Participants will also be asked to collect a stool sample  
204 at home 3 weeks after their baseline assessment.

205 **Table 3.** Study Schedule.

|                                 | <b>Screening &amp; Enrolment</b> | <b>Baseline &amp; Treatment day 1</b> | <b>Treatment day 2*</b>     | <b>48 hours</b>              | <b>1-week</b>                | <b>3-weeks</b>                | <b>6-weeks</b>                | <b>12-weeks</b>                |
|---------------------------------|----------------------------------|---------------------------------------|-----------------------------|------------------------------|------------------------------|-------------------------------|-------------------------------|--------------------------------|
| Scheduling                      | <i>3 weeks before baseline</i>   | <i>3 weeks after enrolment</i>        | <i>1 day after baseline</i> | <i>2 days after baseline</i> | <i>1 week after baseline</i> | <i>3 weeks after baseline</i> | <i>6 weeks after baseline</i> | <i>12 weeks after baseline</i> |
| Visit type                      | <i>Clinic</i>                    | <i>Clinic</i>                         | <i>Clinic</i>               | <i>Phone-call</i>            | <i>Phone-call</i>            | <i>Phone-call</i>             | <i>Clinic</i>                 | <i>Clinic</i>                  |
| Eligibility screen              | ✓                                |                                       |                             |                              |                              |                               |                               |                                |
| Informed consent                | ✓                                |                                       |                             |                              |                              |                               |                               |                                |
| FMT treatment                   |                                  | ✓                                     | ✓                           |                              |                              |                               |                               |                                |
| Adverse events                  |                                  |                                       | ✓                           | ✓                            | ✓                            | ✓                             | ✓                             | ✓                              |
| Tolerability questionnaire      |                                  |                                       | ✓                           |                              |                              |                               |                               |                                |
| Background questionnaire        |                                  | ✓                                     |                             |                              |                              |                               |                               |                                |
| Eating disorder symptoms (EDEQ) |                                  | ✓                                     |                             |                              |                              |                               | ✓                             | ✓                              |
| Depression symptoms (PHQ-9)     | ✓                                | ✓                                     |                             |                              |                              |                               | ✓                             | ✓                              |
| Anxiety symptoms (GAD-7)        |                                  | ✓                                     |                             |                              |                              |                               | ✓                             | ✓                              |
| Stool sample                    | ✓                                | ✓                                     |                             |                              |                              | ✓                             | ✓                             | ✓                              |
| Blood sample                    |                                  | ✓                                     |                             |                              |                              |                               | ✓                             | ✓                              |
| Body composition scan (DXA)     | ✓                                |                                       |                             |                              |                              |                               |                               | ✓                              |

206 DXA, dual-energy X-ray absorptiometry; EDEQ, Eating Disorder Examination Questionnaire; FMT, faecal microbiome transfer; GAD-7, General Anxiety Disorder 7-item scale; PHQ-9, Patient Health  
 207 Questionnaire 9.  
 208 \*Study timeline is based on a 2-day treatment schedule. If a participant decides to spread their treatment over 4 consecutive days, the tolerability questionnaire will be administered on the final day of  
 209 treatment (day 4) and the 48 hour phone call will be 24 hours after the final dose of capsules.

1  
2  
3 210 **Data collection and follow-up**

4 211 *Stool sample collection*

5  
6 212 Stool samples will be collected from participants 3 weeks before treatment, at baseline, and 3, 6, and 12  
7 213 weeks after treatment to assess changes in the gut microbiome, metabolome, and levels of intestinal  
8 214 inflammation. Where possible, stool samples will be collected on site except for the “3 weeks before” and  
9 215 “3 weeks after” treatment samples which the participant will collect at home. If a participant cannot  
10 216 produce a stool sample during their clinical assessment visit, they will be given a stool collection kit to  
11 217 take home. Collection kits contain a stool catcher, disposable gloves, specimen bag, specimen pottle,  
12 218 DNA/RNA Shield Fecal Collection tube (#R1101, Zymo Research, Irvine, California, USA), and a step-  
13 219 by-step instruction card. If the sample is collected at home, participants will be asked to store their  
14 220 samples within their home freezer until their next appointment or arrange for collection by a member of  
15 221 the research team. Upon receipt, stool samples will be aliquoted and stored in -80°C freezers at Te Ira  
16 222 Kāwai – Auckland Regional Biobank. Stool collected in the DNA/RNA Shield Fecal Collection tube will be  
17 223 reserved for gut microbiome assessment. Stool collected in the specimen pottle (i.e. not containing any  
18 224 stabilisation buffer) will be reserved for metabolomics and intestinal inflammation assays (e.g.  
19 225 calprotectin, lactoferrin, and S100A12 [62]).  
20  
21  
22  
23  
24  
25  
26 226

27  
28 227 *Gut microbiome profiling*

29 228 DNA and RNA will be extracted using the ZymoBIOMICS MagBead DNA/RNA kit (Zymo Research,  
30 229 #R2136) according to the manufacturer’s instructions with the addition of a bead bashing lysis step (Zymo  
31 230 Research, #S6002-96-3). Shotgun metagenomic and metatranscriptomic sequencing will be performed  
32 231 by a commercial provider using Illumina’s paired-end sequencing technology. Sequencing data will be  
33 232 processed as performed previously [56], using bioBakery tools for meta’omic profiling [63]. In particular,  
34 233 StrainPhlAn [64] will be used to generate single nucleotide polymorphism (SNP) haplotypes representing  
35 234 the dominant strain of any given species within a sample. We will use these SNP haplotypes to compare  
36 235 the genetic similarity of donor and recipient strains before and after treatment to assess the proportion  
37 236 and stability of donor strain engraftment.  
38  
39  
40  
41  
42 237

43  
44 238 *Blood sample collection*

45 239 Blood samples will be collected at baseline, 6 weeks, and 12 weeks after treatment to assess nutritional  
46 240 status, inflammation, and liver/thyroid function (Table 4). A subset of these tests will be performed in real-  
47 241 time throughout the study period for safety monitoring. These tests will also be repeated at the completion  
48 242 of study for evaluation of study outcomes, avoiding any potential batch effects.  
49  
50  
51 243

52 244 **Table 4.** Blood test schedule for all clinical assessment visits (baseline, week 6, week 12).

|                                  | Safety monitoring | Study outcomes |
|----------------------------------|-------------------|----------------|
| Electrolytes (Sodium, Potassium) | ✓                 | ✓              |
| Creatinine                       | ✓                 | ✓              |
| Ferritin                         | ✓                 | ✓              |
| Total protein                    | ✓                 | ✓              |
| Albumin                          | ✓                 | ✓              |

|                                   |   |   |
|-----------------------------------|---|---|
| Alkaline phosphatase (ALP)        | ✓ | ✓ |
| Alanine aminotransferase (ALT)    | ✓ | ✓ |
| Gamma-glutamyl transferase (GGT)  | ✓ | ✓ |
| Aspartate aminotransferase (AST)  |   | ✓ |
| C-reactive protein (CRP)          |   | ✓ |
| Cholinesterase                    |   | ✓ |
| Folate                            |   | ✓ |
| Vitamin B12                       |   | ✓ |
| Cortisol                          |   | ✓ |
| Free thyroxine                    |   | ✓ |
| Thyroid stimulating hormone (TSH) |   | ✓ |
| Serotonin (5-HT)                  |   | ✓ |

245

### 246 *Anthropometry and body composition*

247 Anthropometric and body composition measurements are potentially triggering for people with AN.  
 248 Discussions and feedback from eating disorder specialists and recovered individuals have confirmed that  
 249 regular body weight measurements (specifically standing on scales) throughout the study could cause  
 250 unnecessary stress for participants given the primary focus of the study is on gut microbiome restoration.  
 251 However, anthropometry and body composition measurements are important for safety monitoring and  
 252 detection of potential adverse events. Therefore, a DXA scan will be performed at enrolment and 12  
 253 weeks after treatment to assess body weight and composition (including the proportion of lean mass, fat  
 254 mass, and bone mineral density). We will also measure participants' height barefoot using a wall-mounted  
 255 stadiometer and combine this information with the DXA-generated body weights to calculate BMI.

256

### 257 *Questionnaires*

258 All questionnaires will be completed by the participants online using data capture tools from the web-  
 259 based research platform, REDCap (Research Electronic Data Capture), hosted in secure servers at the  
 260 University of Auckland. At the beginning of the study, we will collect background demographic information  
 261 from participants including their age, sex assigned at birth, gender identity, self-reported ethnicity,  
 262 socioeconomic status (based on physical address), age when first diagnosed with AN, and current  
 263 medications. Socioeconomic status will be estimated using the New Zealand Indices of Multiple  
 264 Deprivation [65].

265

266 After their final dose of capsules, participants will complete a short questionnaire to gather their views  
 267 and experience of taking the treatment. Specifically, participants will be asked how difficult it was to  
 268 swallow the capsules, whether they experienced any unpleasant side effects during and/or after  
 269 swallowing the capsules, and whether they would consider taking the treatment again if it was later shown  
 270 to be beneficial for recovery.

271

272 Participants will also complete three established health questionnaires at baseline, 6 weeks, and 12  
 273 weeks after treatment: 1) Eating Disorder Examination Questionnaire (EDEQ v6.0) [66], 2) Patient Health  
 274 Questionnaire 9 (PHQ-9) for symptoms of depression [58], and 3) General Anxiety Disorder 7-item scale  
 275 (GAD-7) [67].

1  
2  
3 276  
4 277 **Safety monitoring**  
5  
6 278 By adopting strict selection criteria for donors, we will reduce the risk of infection via FMT by minimising  
7 279 the potential transmission of pathogenic organisms. Participants will take each dose of FMT in our clinic  
8 280 under the supervision of a research clinician and/or nurse, where they will remain under close monitoring  
9 281 for at least one hour afterwards. Based on our previous experience and existing evidence, it is unlikely  
10 282 that participants will experience any severe adverse events [42]. However, participants will be instructed  
11 283 to seek immediate medical attention if they develop any severe adverse reactions following treatment.  
12 284 We will contact participants 24 hours after ingestion of each set of capsules, as well as 1, 3, 6, and 12  
13 285 weeks after treatment to enquire about any adverse side effects. Specifically, participants will be asked  
14 286 to report on the following events: loose or bloody stools, abdominal pain, vomiting, nausea, constipation,  
15 287 flatulence, bloating, fever, malodorous burps, flu-like symptoms, allergic symptoms, appetite, fatigue, and  
16 288 agitation. Adverse events will be graded in accordance with Common Terminology Criteria for Adverse  
17 289 Events v4.0 (CTCAE) [68].  
18  
19  
20  
21  
22  
23

24 291 In addition, we will monitor blood markers of nutritional status and liver function (Table 4), any available  
25 292 body weight records as provided by the participant's clinical care team, and questionnaire scores  
26 293 throughout the study in case any of the participants' health starts deteriorating. If the participant answers  
27 294 "several days", "more than half the days" or "nearly every day" to PHQ-9, question 9 "Thoughts that you  
28 295 would be better off dead or of hurting yourself in some way", the research clinician will interview the  
29 296 participant further and provide them with safety management information to take home. Before the  
30 297 participant leaves the clinic, the research clinician will also recommend clinical follow-up and contact the  
31 298 participant's routine care provider and/or the research psychiatrist to ensure additional mental health  
32 299 support is provided.  
33  
34  
35  
36  
37  
38

39 301 These clinical and adverse event data will be reviewed by an independent data monitoring committee  
40 302 (DMC) who can decide to stop the trial if the safety of participants is thought to have been compromised.  
41 303 Any serious adverse event or clinical result will be notified immediately to the DMC.  
42  
43  
44

45 305 We will strongly advise participants to bring a support person to their study appointments. The support  
46 306 person could be a family member, friend, or member of their support team. Following discussions with  
47 307 our advisers, this person would support the participant during and after the clinic visits, provide comfort  
48 308 and reassurance to the participant throughout the study, and act as an additional point of contact in case  
49 309 the participant becomes uncontactable during the study period.  
50  
51  
52

## 53 311 **Outcomes**

### 54 312 *Primary outcome*

- 55 313
- 56 314 • A shift in gut microbiome composition at 3 weeks post-FMT (Bray-Curtis dissimilarity). The shift  
57 315 should exceed the drift in gut microbiome composition measured over the 3 weeks between  
58 enrolment and baseline.



- 1  
2  
3 316  
4 317 *Secondary outcomes*  
5  
6 318
  - Adverse events associated with FMT treatment

7 319
  - Proportion of participants who swallow all 20 treatment capsules

8  
9 320
  - Proportion of participants who would consider having the treatment again if effective

10 321
  - Gut microbiome diversity, composition and functional potential at 6, and 12 weeks post-FMT

11 322
  - Donor strain engraftment at 3, 6, and 12 weeks post-FMT

12 323
  - Intestinal inflammation at 6 and 12 weeks post-FMT

13 324
  - Blood markers of nutritional status and liver/thyroid function at 6 and 12 weeks post-FMT

14 325
  - Eating disorder symptoms at 6 and 12 weeks post-FMT

15 326
  - Depression symptoms at 6 and 12 weeks post-FMT

16 327
  - Anxiety symptoms at 6 and 12 weeks post-FMT

17 328
  - BMI at 12 weeks post-FMT

18 329
  - Body composition at 12 weeks post-FMT

19  
20  
21  
22  
23  
24 330

### 331 **Sample size calculation**

332 Our primary outcome is a shift in the gut microbiome composition at 3 weeks post-FMT. Because we do  
333 not have a control group to compare against, we will instead collect a stool sample 3 weeks prior to FMT  
334 to assess the background drift in the gut microbiome over a 3 week period without any intervention. We  
335 will use the Bray-Curtis dissimilarity index to compare gut microbiome composition profiles between  
336 sampling time points and test for a difference in these values using a paired t-test. To identify a shift in  
337 the gut microbiome above background drift, we will need 18 participants (80% power, alpha = 0.05). This  
338 calculation was based on data from our previous FMT trial [42] comparing the gut microbiome shifts  
339 between 39 FMT and 44 placebo recipients over 6 weeks (Bray-Curtis dissimilarity to baseline; FMT  
340 mean 0.574, Placebo mean 0.416, delta = 0.158, SD = 0.163, t-test p = 2.754e-06). To account for a  
341 potential dropout rate of 10%, we aim to recruit at least 20 participants who complete treatment and the  
342 primary outcome assessment.  
343

### 344 **Statistical analyses**

345 We will perform both intention-to-treat and per-protocol analyses. Per-protocol analyses will only include  
346 data from those that complete the full treatment dose. Baseline demographics and clinical characteristics  
347 will be summarised using descriptive statistics. Gut microbiome shifts will be assessed by calculating the  
348 Bray-Curtis dissimilarity index to and from baseline using species-level relative abundance profiles. To  
349 assess the primary outcome, a two-sided paired t-test will compare the potential shift in gut microbiome  
350 composition 3 weeks before treatment to the shift 3 weeks after treatment. No imputation will be  
351 performed for missing data, and statistical significance will be set at  $p < 0.05$ .  
352

353 Multivariate Association with Linear Models (MaAsLin2) will be used to examine changes in the relative  
354 abundances of microbial taxa and their encoded functions in response to treatment. We will also use  
355 MaAsLin2 to explore associations between microbiome features and clinical outcomes.

1  
2  
3 356  
4 357 Changes in clinical outcomes from baseline will be assessed using paired t-tests (parametric) or Wilcoxon  
5 358 signed rank tests (non-parametric), as appropriate. However, we acknowledge that we cannot make any  
6 359 treatment efficacy claims based on these paired within-group analyses and without a control group.  
7  
8 360

### 361 **Patient and public involvement**

362 This study has been co-designed in consultation with members from the Eating Disorders Association  
363 New Zealand (EDANZ) as well as women who have previously recovered from AN. These discussions  
364 ensured the study was designed appropriately to minimise participant stress and burden. The study  
365 protocol, participant information sheet, and recruitment material have all been reviewed by EDANZ and  
366 our study advisors. EDANZ has also offered to support in recruitment for the study by posting on their  
367 social media platforms and recommending local clinics and services for us to contact.  
368

## 369 **ETHICS AND DISSEMINATION**

### 370 **Ethics approval**

371 Ethics approval for the study was granted by the Central Health and Disability Ethics Committee  
372 (reference number: 21/CEN/212). The study protocol adheres to the ethical guidelines outlined in the  
373 Declaration of Helsinki [69]. All participants will provide written informed consent before participating in  
374 the study.  
375

### 376 **Data management**

377 Each participant in the study will be given a unique de-identified study ID that will be used to label all their  
378 data and samples collected throughout the study. All recorded clinical data will be entered and stored in  
379 the web-based platform REDCap, which is hosted in secure servers at the University of Auckland. Access  
380 to these data will be restricted to the members of the research team. Clinical data will be stored for a  
381 minimum period of 10 years. Biological samples (i.e., stool and blood samples) will be securely stored for  
382 up to five years in -80°C freezers at Te Ira Kāwai - Auckland Regional Biobank, with access restricted to  
383 members of the research team for the purposes of this study only. All study personnel involved in data  
384 and tissue collection will be trained in good clinical practice (GCP), study protocol, and collection  
385 requirements. Participants will have the right to access and correct their personal data without being  
386 withdrawn from the study. If a participant withdraws from the study, any samples or data collected prior  
387 to withdrawal will continue to be used and included in the study.  
388

### 389 **Data availability**

390 At the completion of the study, the de-identified post-filtered metagenomic sequencing data will be made  
391 publicly available on NCBI's sequence read archive (SRA). Note that this data set does not contain human  
392 DNA sequences. The de-identified clinical data may be made available for future research upon valid  
393 requests to the Liggins Institute Clinical Data Research Hub Data Access Committee. Requestors will  
394 need to provide a methodologically sound proposal, obtain appropriate ethics approval, and sign a Data  
395 Access Agreement. The Data Access Agreement will include a commitment to using the data only for the

396 specified proposal, not to attempt to identify any individual participants, to securely store and use the  
397 data, and to destroy or return the data after completion of the project. Information on data sharing will be  
398 provided in the participant information sheet and will be listed in the consent form.

399

#### 400 **Dissemination**

401 Findings from this study will be communicated to the scientific community through publications in peer-  
402 reviewed journals and presentations at relevant conferences and meetings. Study participants will be  
403 informed of the study findings as soon as the results become available. Study findings will also be  
404 presented to EDANZ and interested participant care providers. In addition, we will communicate our  
405 findings with the general public through liaison with the Liggins Institute's communications manager.

406

#### 407 **ACKNOWLEDGMENTS**

408 The authors would like to thank Nicki Wilson on behalf of Eating Disorders Association New Zealand  
409 (EDANZ) as well as Genevieve Mora, Emma Wilson, Rebecca Slykerman, and Russell Walmsley for  
410 helpful conversations and their valuable feedback on the study design. The authors would also like to  
411 thank the Liggins Institute's Māori Advisory Group and Keri Opai from Wise Group for helping to develop  
412 the study framework with Māori perspectives. We are very grateful to the Rockfield Trust for their  
413 generous donation to fund this study.

414

#### 415 **AUTHOR CONTRIBUTIONS**

416 Funding acquisition: WC, JO

417 Consultation: BW, JD, BA, KL, CC, MD, HT, WC, JO

418 Study design: BW, JD, BA, KL, RTC, CC, MD, TE, TV, HT, WC, JO

419 Ethics application: BW, JD, BA, KL, TE, TV, HT, WC, JO

420 Protocol drafting: BW

421 Protocol revision: BW, JD, BA, KL, RTC, CC, MD, TE, TV, HT, WC, JO

422

#### 423 **CONFLICTS OF INTERESTS**

424 The authors have no conflicts of interest to declare.

425

#### 426 **FUNDING**

427 This study is fully funded by the Rockfield Trust (Award/Grant no: NA). The funders had no involvement  
428 in the design of the study, and will have no involvement in the collection, analyses, interpretation of  
429 data, or in the writing or decision to publish the manuscript on study findings.

57

58

59

60

430 **REFERENCES**

- 431 1. Breton, J., Déchelotte, P., & Ribet, D. (2019). Intestinal microbiota and anorexia nervosa.  
432 *Clinical Nutrition Experimental*, 28: 11–21.
- 433 2. Arcelus, J., Mitchell, A.J., Wales, J., & Nielsen, S. (2011). Mortality rates in patients with  
434 anorexia nervosa and other eating disorders: A meta-analysis of 36 studies. *Archives of General*  
435 *Psychiatry*, 68(7): 724–731.
- 436 3. Fernandez-Aranda, F., Pinheiro, A.P., Tozzi, F., et al (2007). Symptom profile of major  
437 depressive disorder in women with eating disorders. *Australian and New Zealand Journal of*  
438 *Psychiatry*, 41(1): 24–31.
- 439 4. Hetterich, L., Mack, I., Giel, K.E., et al (2019). An update on gastrointestinal disturbances in  
440 eating disorders. *Molecular and Cellular Endocrinology*, 497: 110318.
- 441 5. Kaye, W.H., Bulik, C.M., Thornton, L., et al (2004). Comorbidity of anxiety disorders with  
442 anorexia and bulimia nervosa. *The American Journal of Psychiatry*, 161(12): 2215–2221.
- 443 6. Galmiche, M., Déchelotte, P., Lambert, G., & Tavolacci, M.P. (2019). Prevalence of eating  
444 disorders over the 2000-2018 period: A systematic literature review. *American Journal of Clinical*  
445 *Nutrition*, 109(5): 1402–1413.
- 446 7. Rikani, A.A., Choudhry, Z., Choudhry, A.M., et al (2013). A critique of the literature on etiology of  
447 eating disorders. *Annals of Neurosciences*, 20(4): 157–161.
- 448 8. Duncan, L., Yilmaz, Z., Gaspar, H., et al (2017). Significant locus and metabolic genetic  
449 correlations revealed in genome-wide association study of anorexia nervosa. *The American*  
450 *Journal of Psychiatry*, 174(9): 850–858.
- 451 9. Watson, H.J., Yilmaz, Z., Thornton, L.M., et al (2019). Genome-wide association study identifies  
452 eight risk loci and implicates metabo-psychiatric origins for anorexia nervosa. *Nature Genetics*,  
453 51(8): 1207–1214.
- 454 10. Fetissov, S.O. (2017). Role of the gut microbiota in host appetite control: Bacterial growth to  
455 animal feeding behaviour. *Nature Reviews Endocrinology*, 13(1): 11–25.
- 456 11. Visconti, A., Le Roy, C.I., Rosa, F., et al (2019). Interplay between the human gut microbiome  
457 and host metabolism. *Nature Communications*, 10(1): 1–10.
- 458 12. Martin, A.M., Sun, E.W., Rogers, G.B., & Keating, D.J. (2019). The influence of the gut  
459 microbiome on host metabolism through the regulation of gut hormone release. *Frontiers in*  
460 *Physiology*, 10: 428.
- 461 13. Glenny, E.M., Bulik-Sullivan, E.C., Tang, Q., et al (2017). Eating disorders and the intestinal  
462 microbiota: Mechanisms of energy homeostasis and behavioral influence. *Current Psychiatry*  
463 *Reports*, 19(8): 51.
- 464 14. Armougom, F., Henry, M., Vialettes, B., et al (2009). Monitoring bacterial community of human  
465 gut microbiota reveals an increase in *Lactobacillus* in obese patients and *Methanogens* in  
466 anorexic patients. *PLOS ONE*, 4(9): e7125.
- 467 15. Million, M., Angelakis, E., Maraninchi, M., et al (2013). Correlation between body mass index  
468 and gut concentrations of *Lactobacillus reuteri*, *Bifidobacterium animalis*, *Methanobrevibacter*  
469 *smithii* and *Escherichia coli*. *International Journal of Obesity*, 37(11): 1460–1466.

1  
2  
3  
4  
5  
6  
7  
8  
9  
10  
11  
12  
13  
14  
15  
16  
17  
18  
19  
20  
21  
22  
23  
24  
25  
26  
27  
28  
29  
30  
31  
32  
33  
34  
35  
36  
37  
38  
39  
40  
41  
42  
43  
44  
45  
46  
47  
48  
49  
50  
51  
52  
53  
54  
55  
56  
57  
58  
59  
60

- 470 16. Prochazkova, P., Roubalova, R., Dvorak, J., et al (2021). The intestinal microbiota and  
471 metabolites in patients with anorexia nervosa. *Gut Microbes*, 13(1): 1–25.
- 472 17. Fan, Y., Støving, R.K., Berreira Ibraim, S., et al (2023). The gut microbiota contributes to the  
473 pathogenesis of anorexia nervosa in humans and mice. *Nature Microbiology*, : 1–16.
- 474 18. Morita, C., Tsuji, H., Hata, T., et al (2015). Gut dysbiosis in patients with anorexia nervosa.  
475 *PLOS ONE*, 10(12): e0145274.
- 476 19. Kleiman, S.C., Watson, H.J., Bulik-Sullivan, E.C., et al (2015). The intestinal microbiota in acute  
477 anorexia nervosa and during renourishment: Relationship to depression, anxiety, and eating  
478 disorder psychopathology. *Psychosomatic Medicine*, 77(9): 969–981.
- 479 20. Mack, I., Cuntz, U., Grmer, C., et al (2016). Weight gain in anorexia nervosa does not ameliorate  
480 the faecal microbiota, branched chain fatty acid profiles, and gastrointestinal complaints.  
481 *Scientific Reports*, 6: 26752.
- 482 21. Mörk, S., Lackner, S., Müller, W., et al (2017). Gut microbiota and body composition in anorexia  
483 nervosa inpatients in comparison to athletes, overweight, obese, and normal weight controls.  
484 *International Journal of Eating Disorders*, 50(12): 1421–1431.
- 485 22. Borgo, F., Riva, A., Benetti, A., et al (2017). Microbiota in anorexia nervosa: The triangle  
486 between bacterial species, metabolites and psychological tests. *PLOS ONE*, 12(6): e0179739.
- 487 23. Hanachi, M., Manichanh, C., Schoenenberger, A., et al (2019). Altered host-gut microbes  
488 symbiosis in severely malnourished anorexia nervosa (AN) patients undergoing enteral nutrition:  
489 An explicative factor of functional intestinal disorders? *Clinical Nutrition*, 38(5): 2304–2310.
- 490 24. Schulz, N., Belheouane, M., Dahmen, B., et al (2021). Gut microbiota alteration in adolescent  
491 anorexia nervosa does not normalize with short-term weight restoration. *International Journal of*  
492 *Eating Disorders*, 54(6): 969–980.
- 493 25. Monteleone, A.M., Troisi, J., Fasano, A., et al (2021). Multi-omics data integration in anorexia  
494 nervosa patients before and after weight regain: A microbiome-metabolomics investigation.  
495 *Clinical Nutrition*, 40(3): 1137–1146.
- 496 26. Di Lodovico, L., Mondot, S., Doré, J., et al (2021). Anorexia nervosa and gut microbiota: A  
497 systematic review and quantitative synthesis of pooled microbiological data. *Progress in Neuro-*  
498 *Psychopharmacology and Biological Psychiatry*, 106: 110114.
- 499 27. Camilleri, M. (2019). Leaky gut: mechanisms, measurement and clinical implications in humans.  
500 *Gut*, 68(8): 1516–1526.
- 501 28. Seitz, J., Belheouane, M., Schulz, N., et al (2019). The impact of starvation on the microbiome  
502 and gut-brain interaction in anorexia nervosa. *Frontiers in Endocrinology*, 10: 41.
- 503 29. Monteleone, P., Carratù, R., Cartenì, M., et al (2004). Intestinal permeability is decreased in  
504 anorexia nervosa. *Molecular Psychiatry*, 9(1): 76–80.
- 505 30. Achamrah, N., Nobis, S., Breton, J., et al (2016). Maintaining physical activity during refeeding  
506 improves body composition, intestinal hyperpermeability and behavior in anorectic mice.  
507 *Scientific Reports*, 6(1): 1–15.
- 508 31. Jésus, P., Ouelaa, W., François, M., et al (2014). Alteration of intestinal barrier function during  
509 activity-based anorexia in mice. *Clinical Nutrition*, 33(6): 1046–1053.
- 510 32. Breton, J., Legrand, R., Akkermann, K., et al (2016). Elevated plasma concentrations of bacterial

- 1  
2  
3 511 ClpB protein in patients with eating disorders. *International Journal of Eating Disorders*, 49(8):  
4 512 805–808.
- 5  
6 513 33. Ghenciulescu, A., Park, R.J., & Burnet, P.W.J. (2021). The gut microbiome in anorexia nervosa:  
7 514 friend or foe? *Frontiers in Psychiatry*, 11: 611677.
- 8  
9 515 34. Molfino, A., Amabile, M.I., Imbimbo, G., et al (2020). Plasma enterobacterial ClpB levels and  
10 516 ClpB- and  $\alpha$ -MSH-reactive immunoglobulins in lung cancer patients with and without anorexia.  
11 517 *Nutrition*, 78: 110952.
- 12  
13 518 35. Hata, T., Miyata, N., Takakura, S., et al (2019). The gut microbiome derived from anorexia  
14 519 nervosa patients impairs weight gain and behavioral performance in female mice.  
15 520 *Endocrinology*, 160(10): 2441–2452.
- 16  
17 521 36. Glenny, E.M., Fouladi, F., Thomas, S.A., et al (2021). Gut microbial communities from patients  
18 522 with anorexia nervosa do not influence body weight in recipient germ-free mice. *Gut microbes*,  
19 523 13(1): 1–15.
- 20  
21 524 37. Ruusunen, A., Rocks, T., Jacka, F., & Loughman, A. (2019). The gut microbiome in anorexia  
22 525 nervosa: relevance for nutritional rehabilitation. *Psychopharmacology*, 236(5): 1545–1558.
- 23  
24 526 38. NZ Eating Disorders Clinic Anorexia Nervosa. [https://www.nzeatingdisordersclinic.co.nz/eating-](https://www.nzeatingdisordersclinic.co.nz/eating-disorders/anorexia-nervosa/)  
25 527 [disorders/anorexia-nervosa/](https://www.nzeatingdisordersclinic.co.nz/eating-disorders/anorexia-nervosa/). Accessed 17 Nov 2020
- 26  
27 528 39. Cammarota, G., Ianiro, G., & Gasbarrini, A. (2014). Fecal microbiota transplantation for the  
28 529 treatment of *Clostridium difficile* infection: a systematic review. *Journal of Clinical*  
29 530 *Gastroenterology*, 48(8): 693–702.
- 30  
31 531 40. Yu, E.W., Gao, L., Stastka, P., et al (2020). Fecal microbiota transplantation for the improvement  
32 532 of metabolism in obesity: The FMT-TRIM double-blind placebo-controlled pilot trial. *PLOS*  
33 533 *Medicine*, 17(3): e1003051.
- 34  
35 534 41. Allegretti, J.R., Kassam, Z., Hurtado, J., et al (2021). Impact of fecal microbiota transplantation  
36 535 with capsules on the prevention of metabolic syndrome among patients with obesity. *Hormones*,  
37 536 20: 209–211.
- 38  
39 537 42. Leong, K.S.W., Jayasinghe, T.N., Wilson, B.C., et al (2020). Effects of fecal microbiome transfer  
40 538 in adolescents with obesity: the gut bugs randomized controlled trial. *JAMA Network Open*,  
41 539 3(12): e2030415.
- 42  
43 540 43. Vrieze, A., Van Nood, E., Holleman, F., et al (2012). Transfer of intestinal microbiota from lean  
44 541 donors increases insulin sensitivity in individuals with metabolic syndrome. *Gastroenterology*,  
45 542 143(4): 913-916.e7.
- 46  
47 543 44. Kootte, R.S., Levin, E., Salojärvi, J., et al (2017). Improvement of insulin sensitivity after lean  
48 544 donor feces in metabolic syndrome is driven by baseline intestinal microbiota composition. *Cell*  
49 545 *Metabolism*, 26(4): 611-619.e6.
- 50  
51 546 45. Smits, L.P., Kootte, R.S., Levin, E., et al (2018). Effect of vegan fecal microbiota transplantation  
52 547 on carnitine- and choline-derived trimethylamine-N-oxide production and vascular inflammation  
53 548 in patients with metabolic syndrome. *Journal of the American Heart Association*, 7(7): e008342.
- 54  
55 549 46. de Groot, P., Scheithauer, T., Bakker, G.J., et al (2019). Donor metabolic characteristics drive  
56 550 effects of faecal microbiota transplantation on recipient insulin sensitivity, energy expenditure  
57 551 and intestinal transit time. *Gut*, 69(3): 502–512.

1  
2  
3  
4  
5  
6  
7  
8  
9  
10  
11  
12  
13  
14  
15  
16  
17  
18  
19  
20  
21  
22  
23  
24  
25  
26  
27  
28  
29  
30  
31  
32  
33  
34  
35  
36  
37  
38  
39  
40  
41  
42  
43  
44  
45  
46  
47  
48  
49  
50  
51  
52  
53  
54  
55  
56  
57  
58  
59  
60

- 552 47. Paramsothy, S., Paramsothy, R., Rubin, D.T., et al (2017). Faecal microbiota transplantation for  
553 inflammatory bowel disease: a systematic review and meta-analysis. *Journal of Crohn's and*  
554 *Colitis*, 11(10): 1180–1199.
- 555 48. Ianiro, G., Eusebi, L.H., Black, C.J., et al (2019). Systematic review with meta-analysis: efficacy  
556 of faecal microbiota transplantation for the treatment of irritable bowel syndrome. *Alimentary*  
557 *Pharmacology and Therapeutics*, 50(3): 240–248.
- 558 49. Kang, D.-W., Adams, J.B., Gregory, A.C., et al (2017). Microbiota transfer therapy alters gut  
559 ecosystem and improves gastrointestinal and autism symptoms: an open-label study.  
560 *Microbiome*, 5(1): 10.
- 561 50. Craven, L., Rahman, A., Nair Parvathy, S., et al (2020). Allogenic fecal microbiota  
562 transplantation in patients with nonalcoholic fatty liver disease improves abnormal small  
563 intestinal permeability: a randomized control trial. *American Journal of Gastroenterology*, 115(7):  
564 1055–1065.
- 565 51. Paramsothy, S., Kamm, M.A., Kaakoush, N.O., et al (2017). Multidonor intensive faecal  
566 microbiota transplantation for active ulcerative colitis: a randomised placebo-controlled trial. *The*  
567 *Lancet*, 389(10075): 1218–1228.
- 568 52. Tian, H., Ge, X., Nie, Y., et al (2017). Fecal microbiota transplantation in patients with slow-  
569 transit constipation: a randomized, clinical trial. *PLOS ONE*, 12(2): e0171308.
- 570 53. de Clercq, N.C., Frissen, M.N., Davids, M., et al (2019). Weight gain after fecal microbiota  
571 transplantation in a patient with recurrent underweight following clinical recovery from anorexia  
572 nervosa. *Psychotherapy and Psychosomatics*, 88(1): 58–60.
- 573 54. Prochazkova, P., Roubalova, R., Dvorak, J., et al (2019). Microbiota, microbial metabolites, and  
574 barrier function in a patient with anorexia nervosa after fecal microbiota transplantation.  
575 *Microorganisms*, 7(9): 338.
- 576 55. Youngster, I., Russell, G.H., Pindar, C., et al (2014). Oral, capsulized, frozen fecal microbiota  
577 transplantation for relapsing *Clostridium difficile* infection. *JAMA*, 312(17): 1772.
- 578 56. Wilson, B.C., Vatanen, T., Jayasinghe, T.N., et al (2021). Strain engraftment competition and  
579 functional augmentation in a multi-donor fecal microbiota transplantation trial for obesity.  
580 *Microbiome*, 9(1): 107.
- 581 57. Starship (2019). Eating Disorders - management of.  
582 <https://www.starship.org.nz/guidelines/eating-disorders-management-of/>. Accessed 20 May  
583 2021
- 584 58. Kroenke, K., Spitzer, R.L., & Williams, J.B.W. (2001). The PHQ-9: Validity of a brief depression  
585 severity measure. *Journal of General Internal Medicine*, 16(9): 606–613.
- 586 59. Leong, K.S.W., Jayasinghe, T.N., Derraik, J.G.B., et al (2019). Protocol for the Gut Bugs Trial: a  
587 randomised double-blind placebo-controlled trial of gut microbiome transfer for the treatment of  
588 obesity in adolescents. *BMJ Open*, 9(4): e026174.
- 589 60. DRcaps® Delayed Release Capsules | Capsugel. [https://www.capsugel.com/consumer-health-](https://www.capsugel.com/consumer-health-nutrition-products/drcaps-capsules)  
590 [nutrition-products/drcaps-capsules](https://www.capsugel.com/consumer-health-nutrition-products/drcaps-capsules). Accessed 19 Nov 2020
- 591 61. Elran-Barak, R., Goldschmidt, A.B., Crow, S.J., et al (2017). Is laxative misuse associated with  
592 binge eating? Examination of laxative misuse among individuals seeking treatment for eating

- 1  
2  
3 593 disorders. *International Journal of Eating Disorders*, 50(9): 1114–1118.
- 4 594 62. Lopez, R.N., Leach, S.T., Lemberg, D.A., et al (2017). Fecal biomarkers in inflammatory bowel  
5 595 disease. *Journal of Gastroenterology and Hepatology*, 32(3): 577–582.
- 7 596 63. McIver, L.J., Abu-Ali, G., Franzosa, E.A., et al (2018). BioBakery: A meta'omic analysis  
8 597 environment. *Bioinformatics*, 34(7): 1235–1237.
- 10 598 64. Truong, D.T., Tett, A., Pasolli, E., et al (2017). Microbial strain-level population structure &  
11 599 genetic diversity from metagenomes. *Genome Research*, 27(4): 626–638.
- 13 600 65. Exeter, D.J., Zhao, J., Crengle, S., et al (2017). The New Zealand Indices of Multiple Deprivation  
14 601 (IMD): A new suite of indicators for social and health research in Aotearoa, New Zealand. *PLOS*  
15 602 *ONE*, 12(8): e0181260.
- 17 603 66. Fairburn, C.G., & Beglin, S.J. (2008). Eating Disorder Examination Questionnaire (6.0). In  
18 604 Fairburn CG. Cognitive Behavior Therapy and Eating Disorders. Guilford Press, New York
- 20 605 67. Löwe, B., Decker, O., Müller, S., et al (2008). Validation and standardization of the generalized  
21 606 anxiety disorder screener (GAD-7) in the general population. *Medical Care*, 46(3): 266–274.
- 23 607 68. National Cancer Institute (2009). Common Terminology Criteria for Adverse Events (CTCAE)  
24 608 Version 4.0.
- 26 609 69. World Medical Association (2013). World Medical Association declaration of Helsinki: Ethical  
27 610 principles for medical research involving human subjects. *JAMA*, 310(20): 2191–2194.
- 28  
29 611  
30  
31  
32  
33  
34  
35  
36  
37  
38  
39  
40  
41  
42  
43  
44  
45  
46  
47  
48  
49  
50  
51  
52  
53  
54  
55  
56  
57  
58  
59  
60



# Reporting checklist for protocol of a clinical trial.

Based on the SPIRIT guidelines.

## Instructions to authors

Complete this checklist by entering the page numbers from your manuscript where readers will find each of the items listed below.

Your article may not currently address all the items on the checklist. Please modify your text to include the missing information. If you are certain that an item does not apply, please write "n/a" and provide a short explanation.

Upload your completed checklist as an extra file when you submit to a journal.

In your methods section, say that you used the SPIRIT reporting guidelines, and cite them as:

Chan A-W, Tetzlaff JM, Gøtzsche PC, Altman DG, Mann H, Berlin J, Dickersin K, Hróbjartsson A, Schulz KF, Parulekar WR, Krleža-Jerić K, Laupacis A, Moher D. SPIRIT 2013 Explanation and Elaboration: Guidance for protocols of clinical trials. *BMJ*. 2013;346:e7586

|                                             |                     | Reporting Item                                                                                               | Page Number |
|---------------------------------------------|---------------------|--------------------------------------------------------------------------------------------------------------|-------------|
| <b>Administrative information</b>           |                     |                                                                                                              |             |
| Title                                       | <a href="#">#1</a>  | Descriptive title identifying the study design, population, interventions, and, if applicable, trial acronym | 1           |
| Trial registration                          | <a href="#">#2a</a> | Trial identifier and registry name. If not yet registered, name of intended registry                         | 2           |
| Trial registration: data set                | <a href="#">#2b</a> | All items from the World Health Organization Trial Registration Data Set                                     | n/a         |
| Protocol version                            | <a href="#">#3</a>  | Date and version identifier                                                                                  | 1           |
| Funding                                     | <a href="#">#4</a>  | Sources and types of financial, material, and other support                                                  | 14          |
| Roles and responsibilities: contributorship | <a href="#">#5a</a> | Names, affiliations, and roles of protocol contributors                                                      | 1, 14       |

|    |                           |                     |                                                          |     |
|----|---------------------------|---------------------|----------------------------------------------------------|-----|
| 1  | Roles and                 | <a href="#">#5b</a> | Name and contact information for the trial sponsor       | 1   |
| 2  | responsibilities:         |                     |                                                          |     |
| 3  | sponsor contact           |                     |                                                          |     |
| 4  | information               |                     |                                                          |     |
| 5  |                           |                     |                                                          |     |
| 6  |                           |                     |                                                          |     |
| 7  |                           |                     |                                                          |     |
| 8  | Roles and                 | <a href="#">#5c</a> | Role of study sponsor and funders, if any, in study      | 14  |
| 9  | responsibilities:         |                     | design; collection, management, analysis, and            |     |
| 10 | sponsor and funder        |                     | interpretation of data; writing of the report; and the   |     |
| 11 |                           |                     | decision to submit the report for publication, including |     |
| 12 |                           |                     | whether they will have ultimate authority over any of    |     |
| 13 |                           |                     | these activities                                         |     |
| 14 |                           |                     |                                                          |     |
| 15 |                           |                     |                                                          |     |
| 16 |                           |                     |                                                          |     |
| 17 | Roles and                 | <a href="#">#5d</a> | Composition, roles, and responsibilities of the          | 10  |
| 18 | responsibilities:         |                     | coordinating centre, steering committee, endpoint        |     |
| 19 | committees                |                     | adjudication committee, data management team, and        |     |
| 20 |                           |                     | other individuals or groups overseeing the trial, if     |     |
| 21 |                           |                     | applicable (see Item 21a for data monitoring committee)  |     |
| 22 |                           |                     |                                                          |     |
| 23 |                           |                     |                                                          |     |
| 24 |                           |                     |                                                          |     |
| 25 |                           |                     |                                                          |     |
| 26 | <b>Introduction</b>       |                     |                                                          |     |
| 27 |                           |                     |                                                          |     |
| 28 | Background and            | <a href="#">#6a</a> | Description of research question and justification for   | 3,4 |
| 29 | rationale                 |                     | undertaking the trial, including summary of relevant     |     |
| 30 |                           |                     | studies (published and unpublished) examining benefits   |     |
| 31 |                           |                     | and harms for each intervention                          |     |
| 32 |                           |                     |                                                          |     |
| 33 |                           |                     |                                                          |     |
| 34 |                           |                     |                                                          |     |
| 35 | Background and            | <a href="#">#6b</a> | Explanation for choice of comparators                    | 11  |
| 36 | rationale: choice of      |                     |                                                          |     |
| 37 | comparators               |                     |                                                          |     |
| 38 |                           |                     |                                                          |     |
| 39 |                           |                     |                                                          |     |
| 40 | Objectives                | <a href="#">#7</a>  | Specific objectives or hypotheses                        | 11  |
| 41 |                           |                     |                                                          |     |
| 42 |                           |                     |                                                          |     |
| 43 | Trial design              | <a href="#">#8</a>  | Description of trial design including type of trial (eg, | 4   |
| 44 |                           |                     | parallel group, crossover, factorial, single group),     |     |
| 45 |                           |                     | allocation ratio, and framework (eg, superiority,        |     |
| 46 |                           |                     | equivalence, non-inferiority, exploratory)               |     |
| 47 |                           |                     |                                                          |     |
| 48 |                           |                     |                                                          |     |
| 49 | <b>Methods:</b>           |                     |                                                          |     |
| 50 | <b>Participants,</b>      |                     |                                                          |     |
| 51 | <b>interventions, and</b> |                     |                                                          |     |
| 52 | <b>outcomes</b>           |                     |                                                          |     |
| 53 |                           |                     |                                                          |     |
| 54 |                           |                     |                                                          |     |
| 55 |                           |                     |                                                          |     |
| 56 | Study setting             | <a href="#">#9</a>  | Description of study settings (eg, community clinic,     | 4   |
| 57 |                           |                     | academic hospital) and list of countries where data will |     |
| 58 |                           |                     |                                                          |     |
| 59 |                           |                     |                                                          |     |
| 60 |                           |                     |                                                          |     |

|    |                      |                      |                                                              |       |
|----|----------------------|----------------------|--------------------------------------------------------------|-------|
| 1  |                      |                      | be collected. Reference to where list of study sites can     |       |
| 2  |                      |                      | be obtained                                                  |       |
| 3  |                      |                      |                                                              |       |
| 4  | Eligibility criteria | <a href="#">#10</a>  | Inclusion and exclusion criteria for participants. If        | 5     |
| 5  |                      |                      | applicable, eligibility criteria for study centres and       |       |
| 6  |                      |                      | individuals who will perform the interventions (eg,          |       |
| 7  |                      |                      | surgeons, psychotherapists)                                  |       |
| 8  |                      |                      |                                                              |       |
| 9  |                      |                      |                                                              |       |
| 10 |                      |                      |                                                              |       |
| 11 | Interventions:       | <a href="#">#11a</a> | Interventions for each group with sufficient detail to allow | 6,7   |
| 12 | description          |                      | replication, including how and when they will be             |       |
| 13 |                      |                      | administered                                                 |       |
| 14 |                      |                      |                                                              |       |
| 15 |                      |                      |                                                              |       |
| 16 | Interventions:       | <a href="#">#11b</a> | Criteria for discontinuing or modifying allocated            | 7, 10 |
| 17 | modifications        |                      | interventions for a given trial participant (eg, drug dose   |       |
| 18 |                      |                      | change in response to harms, participant request, or         |       |
| 19 |                      |                      | improving / worsening disease)                               |       |
| 20 |                      |                      |                                                              |       |
| 21 |                      |                      |                                                              |       |
| 22 |                      |                      |                                                              |       |
| 23 | Interventions:       | <a href="#">#11c</a> | Strategies to improve adherence to intervention              | 7, 10 |
| 24 | adherence            |                      | protocols, and any procedures for monitoring adherence       |       |
| 25 |                      |                      | (eg, drug tablet return; laboratory tests)                   |       |
| 26 |                      |                      |                                                              |       |
| 27 |                      |                      |                                                              |       |
| 28 | Interventions:       | <a href="#">#11d</a> | Relevant concomitant care and interventions that are         | 5     |
| 29 | concomitant care     |                      | permitted or prohibited during the trial                     |       |
| 30 |                      |                      |                                                              |       |
| 31 |                      |                      |                                                              |       |
| 32 | Outcomes             | <a href="#">#12</a>  | Primary, secondary, and other outcomes, including the        | 11    |
| 33 |                      |                      | specific measurement variable (eg, systolic blood            |       |
| 34 |                      |                      | pressure), analysis metric (eg, change from baseline,        |       |
| 35 |                      |                      | final value, time to event), method of aggregation (eg,      |       |
| 36 |                      |                      | median, proportion), and time point for each outcome.        |       |
| 37 |                      |                      | Explanation of the clinical relevance of chosen efficacy     |       |
| 38 |                      |                      | and harm outcomes is strongly recommended                    |       |
| 39 |                      |                      |                                                              |       |
| 40 |                      |                      |                                                              |       |
| 41 |                      |                      |                                                              |       |
| 42 |                      |                      |                                                              |       |
| 43 | Participant timeline | <a href="#">#13</a>  | Time schedule of enrolment, interventions (including any     | 8     |
| 44 |                      |                      | run-ins and washouts), assessments, and visits for           |       |
| 45 |                      |                      | participants. A schematic diagram is highly                  |       |
| 46 |                      |                      | recommended (see Figure)                                     |       |
| 47 |                      |                      |                                                              |       |
| 48 |                      |                      |                                                              |       |
| 49 |                      |                      |                                                              |       |
| 50 | Sample size          | <a href="#">#14</a>  | Estimated number of participants needed to achieve           | 11    |
| 51 |                      |                      | study objectives and how it was determined, including        |       |
| 52 |                      |                      | clinical and statistical assumptions supporting any          |       |
| 53 |                      |                      | sample size calculations                                     |       |
| 54 |                      |                      |                                                              |       |
| 55 |                      |                      |                                                              |       |
| 56 |                      |                      |                                                              |       |
| 57 | Recruitment          | <a href="#">#15</a>  | Strategies for achieving adequate participant enrolment      | 4,6   |
| 58 |                      |                      | to reach target sample size                                  |       |
| 59 |                      |                      |                                                              |       |
| 60 |                      |                      |                                                              |       |

1 **Methods:**

2 **Assignment of**  
3 **interventions (for**  
4 **controlled trials)**  
5  
6

|    |                      |                      |                                                           |
|----|----------------------|----------------------|-----------------------------------------------------------|
| 7  |                      |                      |                                                           |
| 8  | Allocation: sequence | <a href="#">#16a</a> | Method of generating the allocation sequence (eg,         |
| 9  | generation           |                      | computer-generated random numbers), and list of any       |
| 10 |                      |                      | factors for stratification. To reduce predictability of a |
| 11 |                      |                      | random sequence, details of any planned restriction (eg,  |
| 12 |                      |                      | blocking) should be provided in a separate document       |
| 13 |                      |                      | that is unavailable to those who enrol participants or    |
| 14 |                      |                      | assign interventions                                      |
| 15 |                      |                      |                                                           |
| 16 |                      |                      |                                                           |
| 17 |                      |                      |                                                           |
| 18 |                      |                      |                                                           |
| 19 | Allocation           | <a href="#">#16b</a> | Mechanism of implementing the allocation sequence (eg,    |
| 20 | concealment          |                      | central telephone; sequentially numbered, opaque,         |
| 21 | mechanism            |                      | sealed envelopes), describing any steps to conceal the    |
| 22 |                      |                      | sequence until interventions are assigned                 |
| 23 |                      |                      |                                                           |
| 24 |                      |                      |                                                           |
| 25 |                      |                      |                                                           |
| 26 | Allocation:          | <a href="#">#16c</a> | Who will generate the allocation sequence, who will       |
| 27 | implementation       |                      | enrol participants, and who will assign participants to   |
| 28 |                      |                      | interventions                                             |
| 29 |                      |                      |                                                           |
| 30 |                      |                      |                                                           |
| 31 | Blinding (masking)   | <a href="#">#17a</a> | Who will be blinded after assignment to interventions     |
| 32 |                      |                      | (eg, trial participants, care providers, outcome          |
| 33 |                      |                      | assessors, data analysts), and how                        |
| 34 |                      |                      |                                                           |
| 35 |                      |                      |                                                           |
| 36 | Blinding (masking):  | <a href="#">#17b</a> | If blinded, circumstances under which unblinding is       |
| 37 | emergency unblinding |                      | permissible, and procedure for revealing a participant's  |
| 38 |                      |                      | allocated intervention during the trial                   |
| 39 |                      |                      |                                                           |
| 40 |                      |                      |                                                           |

41 **Methods: Data**  
42 **collection,**  
43 **management, and**  
44 **analysis**  
45  
46  
47

|    |                      |                      |                                                             |
|----|----------------------|----------------------|-------------------------------------------------------------|
| 48 | Data collection plan | <a href="#">#18a</a> | Plans for assessment and collection of outcome,             |
| 49 |                      |                      | baseline, and other trial data, including any related       |
| 50 |                      |                      | processes to promote data quality (eg, duplicate            |
| 51 |                      |                      | measurements, training of assessors) and a description      |
| 52 |                      |                      | of study instruments (eg, questionnaires, laboratory        |
| 53 |                      |                      | tests) along with their reliability and validity, if known. |
| 54 |                      |                      |                                                             |
| 55 |                      |                      |                                                             |
| 56 |                      |                      |                                                             |
| 57 |                      |                      |                                                             |
| 58 |                      |                      |                                                             |
| 59 |                      |                      |                                                             |
| 60 |                      |                      |                                                             |

Reference to where data collection forms can be found, if not in the protocol

|    |                            |                      |                                                             |
|----|----------------------------|----------------------|-------------------------------------------------------------|
| 1  |                            |                      |                                                             |
| 2  |                            |                      |                                                             |
| 3  |                            |                      |                                                             |
| 4  | Data collection plan:      | <a href="#">#18b</a> | Plans to promote participant retention and complete         |
| 5  | retention                  |                      | follow-up, including list of any outcome data to be         |
| 6  |                            |                      | collected for participants who discontinue or deviate from  |
| 7  |                            |                      | intervention protocols                                      |
| 8  |                            |                      |                                                             |
| 9  |                            |                      |                                                             |
| 10 | Data management            | <a href="#">#19</a>  | Plans for data entry, coding, security, and storage,        |
| 11 |                            |                      | including any related processes to promote data quality     |
| 12 |                            |                      | (eg, double data entry; range checks for data values).      |
| 13 |                            |                      | Reference to where details of data management               |
| 14 |                            |                      | procedures can be found, if not in the protocol             |
| 15 |                            |                      |                                                             |
| 16 |                            |                      |                                                             |
| 17 |                            |                      |                                                             |
| 18 |                            |                      |                                                             |
| 19 | Statistics: outcomes       | <a href="#">#20a</a> | Statistical methods for analysing primary and secondary     |
| 20 |                            |                      | outcomes. Reference to where other details of the           |
| 21 |                            |                      | statistical analysis plan can be found, if not in the       |
| 22 |                            |                      | protocol                                                    |
| 23 |                            |                      |                                                             |
| 24 |                            |                      |                                                             |
| 25 |                            |                      |                                                             |
| 26 | Statistics: additional     | <a href="#">#20b</a> | Methods for any additional analyses (eg, subgroup and       |
| 27 | analyses                   |                      | adjusted analyses)                                          |
| 28 |                            |                      |                                                             |
| 29 |                            |                      |                                                             |
| 30 | Statistics: analysis       | <a href="#">#20c</a> | Definition of analysis population relating to protocol non- |
| 31 | population and             |                      | adherence (eg, as randomised analysis), and any             |
| 32 | missing data               |                      | statistical methods to handle missing data (eg, multiple    |
| 33 |                            |                      | imputation)                                                 |
| 34 |                            |                      |                                                             |
| 35 |                            |                      |                                                             |
| 36 | <b>Methods: Monitoring</b> |                      |                                                             |
| 37 |                            |                      |                                                             |
| 38 |                            |                      |                                                             |
| 39 | Data monitoring:           | <a href="#">#21a</a> | Composition of data monitoring committee (DMC);             |
| 40 | formal committee           |                      | summary of its role and reporting structure; statement of   |
| 41 |                            |                      | whether it is independent from the sponsor and              |
| 42 |                            |                      | competing interests; and reference to where further         |
| 43 |                            |                      | details about its charter can be found, if not in the       |
| 44 |                            |                      | protocol. Alternatively, an explanation of why a DMC is     |
| 45 |                            |                      | not needed                                                  |
| 46 |                            |                      |                                                             |
| 47 |                            |                      |                                                             |
| 48 |                            |                      |                                                             |
| 49 |                            |                      |                                                             |
| 50 | Data monitoring:           | <a href="#">#21b</a> | Description of any interim analyses and stopping            |
| 51 | interim analysis           |                      | guidelines, including who will have access to these         |
| 52 |                            |                      | interim results and make the final decision to terminate    |
| 53 |                            |                      | the trial                                                   |
| 54 |                            |                      |                                                             |
| 55 |                            |                      |                                                             |
| 56 |                            |                      |                                                             |
| 57 | Harms                      | <a href="#">#22</a>  | Plans for collecting, assessing, reporting, and managing    |
| 58 |                            |                      | solicited and spontaneously reported adverse events         |
| 59 |                            |                      |                                                             |
| 60 |                            |                      |                                                             |

and other unintended effects of trial interventions or trial conduct

|    |                                      |                      |                                                                                                                                                                                                                                    |
|----|--------------------------------------|----------------------|------------------------------------------------------------------------------------------------------------------------------------------------------------------------------------------------------------------------------------|
| 1  |                                      |                      |                                                                                                                                                                                                                                    |
| 2  |                                      |                      |                                                                                                                                                                                                                                    |
| 3  |                                      |                      |                                                                                                                                                                                                                                    |
| 4  | Auditing                             | <a href="#">#23</a>  | Frequency and procedures for auditing trial conduct, if any, and whether the process will be independent from investigators and the sponsor                                                                                        |
| 5  |                                      |                      | n/a                                                                                                                                                                                                                                |
| 6  |                                      |                      |                                                                                                                                                                                                                                    |
| 7  |                                      |                      |                                                                                                                                                                                                                                    |
| 8  |                                      |                      |                                                                                                                                                                                                                                    |
| 9  | <b>Ethics and</b>                    |                      |                                                                                                                                                                                                                                    |
| 10 | <b>dissemination</b>                 |                      |                                                                                                                                                                                                                                    |
| 11 |                                      |                      |                                                                                                                                                                                                                                    |
| 12 |                                      |                      |                                                                                                                                                                                                                                    |
| 13 | Research ethics approval             | <a href="#">#24</a>  | Plans for seeking research ethics committee / institutional review board (REC / IRB) approval                                                                                                                                      |
| 14 |                                      |                      | 13                                                                                                                                                                                                                                 |
| 15 |                                      |                      |                                                                                                                                                                                                                                    |
| 16 |                                      |                      |                                                                                                                                                                                                                                    |
| 17 | Protocol amendments                  | <a href="#">#25</a>  | Plans for communicating important protocol modifications (eg, changes to eligibility criteria, outcomes, analyses) to relevant parties (eg, investigators, REC / IRBs, trial participants, trial registries, journals, regulators) |
| 18 |                                      |                      | 13                                                                                                                                                                                                                                 |
| 19 |                                      |                      |                                                                                                                                                                                                                                    |
| 20 |                                      |                      |                                                                                                                                                                                                                                    |
| 21 |                                      |                      |                                                                                                                                                                                                                                    |
| 22 |                                      |                      |                                                                                                                                                                                                                                    |
| 23 |                                      |                      |                                                                                                                                                                                                                                    |
| 24 |                                      |                      |                                                                                                                                                                                                                                    |
| 25 | Consent or assent                    | <a href="#">#26a</a> | Who will obtain informed consent or assent from potential trial participants or authorised surrogates, and how (see Item 32)                                                                                                       |
| 26 |                                      |                      | 4,6                                                                                                                                                                                                                                |
| 27 |                                      |                      |                                                                                                                                                                                                                                    |
| 28 |                                      |                      |                                                                                                                                                                                                                                    |
| 29 |                                      |                      |                                                                                                                                                                                                                                    |
| 30 | Consent or assent: ancillary studies | <a href="#">#26b</a> | Additional consent provisions for collection and use of participant data and biological specimens in ancillary studies, if applicable                                                                                              |
| 31 |                                      |                      | 13                                                                                                                                                                                                                                 |
| 32 |                                      |                      |                                                                                                                                                                                                                                    |
| 33 |                                      |                      |                                                                                                                                                                                                                                    |
| 34 |                                      |                      |                                                                                                                                                                                                                                    |
| 35 |                                      |                      |                                                                                                                                                                                                                                    |
| 36 | Confidentiality                      | <a href="#">#27</a>  | How personal information about potential and enrolled participants will be collected, shared, and maintained in order to protect confidentiality before, during, and after the trial                                               |
| 37 |                                      |                      | 13                                                                                                                                                                                                                                 |
| 38 |                                      |                      |                                                                                                                                                                                                                                    |
| 39 |                                      |                      |                                                                                                                                                                                                                                    |
| 40 |                                      |                      |                                                                                                                                                                                                                                    |
| 41 |                                      |                      |                                                                                                                                                                                                                                    |
| 42 |                                      |                      |                                                                                                                                                                                                                                    |
| 43 | Declaration of interests             | <a href="#">#28</a>  | Financial and other competing interests for principal investigators for the overall trial and each study site                                                                                                                      |
| 44 |                                      |                      | 14                                                                                                                                                                                                                                 |
| 45 |                                      |                      |                                                                                                                                                                                                                                    |
| 46 |                                      |                      |                                                                                                                                                                                                                                    |
| 47 | Data access                          | <a href="#">#29</a>  | Statement of who will have access to the final trial dataset, and disclosure of contractual agreements that limit such access for investigators                                                                                    |
| 48 |                                      |                      | 13                                                                                                                                                                                                                                 |
| 49 |                                      |                      |                                                                                                                                                                                                                                    |
| 50 |                                      |                      |                                                                                                                                                                                                                                    |
| 51 |                                      |                      |                                                                                                                                                                                                                                    |
| 52 | Ancillary and post trial care        | <a href="#">#30</a>  | Provisions, if any, for ancillary and post-trial care, and for compensation to those who suffer harm from trial participation                                                                                                      |
| 53 |                                      |                      | 10                                                                                                                                                                                                                                 |
| 54 |                                      |                      |                                                                                                                                                                                                                                    |
| 55 |                                      |                      |                                                                                                                                                                                                                                    |
| 56 |                                      |                      |                                                                                                                                                                                                                                    |
| 57 | Dissemination policy: trial results  | <a href="#">#31a</a> | Plans for investigators and sponsor to communicate trial results to participants, healthcare professionals, the                                                                                                                    |
| 58 |                                      |                      | 13                                                                                                                                                                                                                                 |
| 59 |                                      |                      |                                                                                                                                                                                                                                    |
| 60 |                                      |                      |                                                                                                                                                                                                                                    |

public, and other relevant groups (eg, via publication, reporting in results databases, or other data sharing arrangements), including any publication restrictions

|    |                       |                      |                                                           |
|----|-----------------------|----------------------|-----------------------------------------------------------|
| 1  |                       |                      |                                                           |
| 2  |                       |                      |                                                           |
| 3  |                       |                      |                                                           |
| 4  |                       |                      |                                                           |
| 5  | Dissemination policy: | <a href="#">#31b</a> | Authorship eligibility guidelines and any intended use of |
| 6  | authorship            |                      | professional writers                                      |
| 7  |                       |                      |                                                           |
| 8  |                       |                      |                                                           |
| 9  | Dissemination policy: | <a href="#">#31c</a> | Plans, if any, for granting public access to the full     |
| 10 | reproducible research |                      | protocol, participant-level dataset, and statistical code |
| 11 |                       |                      |                                                           |
| 12 |                       |                      |                                                           |

## 13 Appendices

|    |                      |                     |                                                               |
|----|----------------------|---------------------|---------------------------------------------------------------|
| 14 |                      |                     |                                                               |
| 15 | Informed consent     | <a href="#">#32</a> | Model consent form and other related documentation            |
| 16 | materials            |                     | given to participants and authorised surrogates               |
| 17 |                      |                     |                                                               |
| 18 |                      |                     |                                                               |
| 19 | Biological specimens | <a href="#">#33</a> | Plans for collection, laboratory evaluation, and storage of   |
| 20 |                      |                     | biological specimens for genetic or molecular analysis in     |
| 21 |                      |                     | the current trial and for future use in ancillary studies, if |
| 22 |                      |                     | applicable                                                    |
| 23 |                      |                     |                                                               |
| 24 |                      |                     |                                                               |
| 25 |                      |                     |                                                               |

26 The SPIRIT Explanation and Elaboration paper is distributed under the terms of the Creative  
 27 Commons Attribution License CC-BY-NC. This checklist was completed on 24. November 2022 using  
 28 <https://www.goodreports.org/>, a tool made by the [EQUATOR Network](#) in collaboration with  
 29 [Penelope.ai](#)  
 30  
 31  
 32  
 33  
 34  
 35  
 36  
 37  
 38  
 39  
 40  
 41  
 42  
 43  
 44  
 45  
 46  
 47  
 48  
 49  
 50  
 51  
 52  
 53  
 54  
 55  
 56  
 57  
 58  
 59  
 60
